# Supplementary material for: 3D radiomics predicts EGFR mutation, exon-19 deletion and exon-21 L858R mutation in lung adenocarcinoma
Source: PubMed Central journal article supplement — Transl Lung Cancer Res. 2020 Aug;9(4):1212–24. doi: 10.21037/tlcr-20-122 (PMC7481623; doi:10.21037/tlcr-20-122), 2020-08
Supplement: tlcr-09-04-1212-supplementary.pdf [file tlcr-09-04-1212-supplementary.pdf]

The radiomic features applied in this study and results of their reliability test

| Radiomic features                                     | Intraclass<br>correlation<br>coefficient |
|-------------------------------------------------------|------------------------------------------|
| exponential_firstorder_10Percentile                   | 0.904083973                              |
| exponential_firstorder_90Percentile                   | 0.988974353                              |
| exponential_firstorder_Energy                         | 0.999592921                              |
| exponential_firstorder_InterquartileRange             | 0.853665748                              |
| exponential_firstorder_Kurtosis                       | 0.954364132                              |
| exponential_firstorder_Maximum                        | 0.941246724                              |
| exponential_firstorder_Mean                           | 0.962386616                              |
| exponential_firstorder_MeanAbsoluteDeviation          | 0.908709603                              |
| exponential_firstorder_Median                         | 0.971504535                              |
| exponential_firstorder_Minimum                        | 0.874016203                              |
| exponential_firstorder_Range                          | 0.940782173                              |
| exponential_firstorder_RobustMeanAbsoluteDeviation    | 0.863435208                              |
| exponential_firstorder_RootMeanSquared                | 0.973753571                              |
| exponential_firstorder_Skewness                       | 0.966384281                              |
| exponential_firstorder_TotalEnergy                    | 0.999592921                              |
| exponential_firstorder_Variance                       | 0.954406441                              |
| exponential_gldm_DifferenceEntropy                    | 1                                        |
| exponential_gldm_JointEntropy                         | 1                                        |
| exponential_gldm_SumEntropy                           | 1                                        |
| exponential_gldm_DependenceEntropy                    | 0.979688108                              |
| exponential_gldm_DependenceNonUniformity              | 0.99923504                               |
| exponential_gldm_DependenceNonUniformityNormalized    | 0.980139525                              |
| exponential_gldm_DependenceVariance                   | 0.955978147                              |
| exponential_gldm_GrayLevelNonUniformity               | 0.999864852                              |
| exponential_gldm_LargeDependenceEmphasis              | 0.974978013                              |
| exponential_gldm_LargeDependenceHighGrayLevelEmphasis | 0.974978013                              |

---

|                                                       |             |
|-------------------------------------------------------|-------------|
| exponential_gldm_LargeDependenceLowGrayLevelEmphasis  | 0.974978013 |
| exponential_gldm_SmallDependenceEmphasis              | 0.919692683 |
| exponential_gldm_SmallDependenceHighGrayLevelEmphasis | 0.919692683 |
| exponential_gldm_SmallDependenceLowGrayLevelEmphasis  | 0.919692683 |
| exponential_glrIm_GrayLevelNonUniformity              | 0.998371796 |
| exponential_glrIm_LongRunEmphasis                     | 0.993222954 |
| exponential_glrIm_LongRunHighGrayLevelEmphasis        | 0.993222954 |
| exponential_glrIm_LongRunLowGrayLevelEmphasis         | 0.993222954 |
| exponential_glrIm_RunEntropy                          | 0.984175372 |
| exponential_glrIm_RunLengthNonUniformity              | 0.984615463 |
| exponential_glrIm_RunLengthNonUniformityNormalized    | 0.965992096 |
| exponential_glrIm_RunPercentage                       | 0.972965937 |
| exponential_glrIm_RunVariance                         | 0.997474272 |
| exponential_glrIm_ShortRunEmphasis                    | 0.922037747 |
| exponential_glrIm_ShortRunHighGrayLevelEmphasis       | 0.922037747 |
| exponential_glrIm_ShortRunLowGrayLevelEmphasis        | 0.922037747 |
| exponential_glszm_GrayLevelNonUniformity              | 0.967427192 |
| exponential_glszm_LargeAreaEmphasis                   | 0.96673107  |
| exponential_glszm_LargeAreaHighGrayLevelEmphasis      | 0.96673107  |
| exponential_glszm_LargeAreaLowGrayLevelEmphasis       | 0.96673107  |
| exponential_glszm_SizeZoneNonUniformity               | 0.952433945 |
| exponential_glszm_SizeZoneNonUniformityNormalized     | 0.755930086 |
| exponential_glszm_ZoneEntropy                         | 0.767641918 |
| exponential_glszm_ZonePercentage                      | 0.965145    |
| exponential_glszm_ZoneVariance                        | 0.997529064 |
| logarithm_firstorder_10Percentile                     | 0.910994665 |
| logarithm_firstorder_90Percentile                     | 0.996282612 |
| logarithm_firstorder_Energy                           | 0.999771311 |
| logarithm_firstorder_Entropy                          | 0.850946339 |

---

---

|                                                  |             |
|--------------------------------------------------|-------------|
| logarithm_firstorder_InterquartileRange          | 0.772747212 |
| logarithm_firstorder_Kurtosis                    | 0.988268185 |
| logarithm_firstorder_Maximum                     | 0.989374797 |
| logarithm_firstorder_Mean                        | 0.980289162 |
| logarithm_firstorder_MeanAbsoluteDeviation       | 0.806482093 |
| logarithm_firstorder_Median                      | 0.998648293 |
| logarithm_firstorder_Minimum                     | 0.963146537 |
| logarithm_firstorder_Range                       | 0.981892169 |
| logarithm_firstorder_RobustMeanAbsoluteDeviation | 0.768586714 |
| logarithm_firstorder_RootMeanSquared             | 0.988472228 |
| logarithm_firstorder_Skewness                    | 0.972577808 |
| logarithm_firstorder_TotalEnergy                 | 0.999771311 |
| logarithm_firstorder_Uniformity                  | 0.875872823 |
| logarithm_firstorder_Variance                    | 0.811336554 |
| logarithm_glcm_Autocorrelation                   | 0.996509921 |
| logarithm_glcm_ClusterProminence                 | 0.973085722 |
| logarithm_glcm_ClusterShade                      | 0.969363163 |
| logarithm_glcm_ClusterTendency                   | 0.768389072 |
| logarithm_glcm_Contrast                          | 0.80437521  |
| logarithm_glcm_Correlation                       | 0.799768695 |
| logarithm_glcm_DifferenceAverage                 | 0.812305345 |
| logarithm_glcm_DifferenceEntropy                 | 0.841875774 |
| logarithm_glcm_DifferenceVariance                | 0.858607105 |
| logarithm_glcm_Id                                | 0.869211505 |
| logarithm_glcm_Idm                               | 0.876963415 |
| logarithm_glcm_Idmn                              | 0.892075215 |
| logarithm_glcm_Idn                               | 0.892775425 |
| logarithm_glcm_Imc1                              | 0.966479761 |
| logarithm_glcm_Imc2                              | 0.929065195 |

---

---

|                                                     |             |
|-----------------------------------------------------|-------------|
| logarithm_glcm_InverseVariance                      | 0.854539965 |
| logarithm_glcm_JointAverage                         | 0.994663106 |
| logarithm_glcm_JointEnergy                          | 0.890968585 |
| logarithm_glcm_JointEntropy                         | 0.838021437 |
| logarithm_glcm_MaximumProbability                   | 0.931555805 |
| logarithm_glcm_SumAverage                           | 0.994663106 |
| logarithm_glcm_SumEntropy                           | 0.813899853 |
| logarithm_glcm_SumSquares                           | 0.77289557  |
| logarithm_gldm_DependenceEntropy                    | 0.885537294 |
| logarithm_gldm_DependenceNonUniformity              | 0.999726509 |
| logarithm_gldm_DependenceNonUniformityNormalized    | 0.848376779 |
| logarithm_gldm_DependenceVariance                   | 0.948496573 |
| logarithm_gldm_GrayLevelNonUniformity               | 0.999788213 |
| logarithm_gldm_GrayLevelVariance                    | 0.811288593 |
| logarithm_gldm_HighGrayLevelEmphasis                | 0.996501643 |
| logarithm_gldm_LargeDependenceEmphasis              | 0.930794447 |
| logarithm_gldm_LargeDependenceHighGrayLevelEmphasis | 0.983878812 |
| logarithm_gldm_LargeDependenceLowGrayLevelEmphasis  | 0.998795061 |
| logarithm_gldm_LowGrayLevelEmphasis                 | 0.981628514 |
| logarithm_gldm_SmallDependenceEmphasis              | 0.877739919 |
| logarithm_gldm_SmallDependenceHighGrayLevelEmphasis | 0.995588286 |
| logarithm_gldm_SmallDependenceLowGrayLevelEmphasis  | 0.963928978 |
| logarithm_glrlm_GrayLevelNonUniformity              | 0.999850752 |
| logarithm_glrlm_GrayLevelNonUniformityNormalized    | 0.876513694 |
| logarithm_glrlm_GrayLevelVariance                   | 0.823388013 |
| logarithm_glrlm_HighGrayLevelRunEmphasis            | 0.996519673 |
| logarithm_glrlm_LongRunEmphasis                     | 0.921438621 |
| logarithm_glrlm_LongRunHighGrayLevelEmphasis        | 0.995991909 |
| logarithm_glrlm_LongRunLowGrayLevelEmphasis         | 0.989810086 |

---

---

|                                                  |             |
|--------------------------------------------------|-------------|
| logarithm_glrlm_LowGrayLevelRunEmphasis          | 0.981091541 |
| logarithm_glrlm_RunEntropy                       | 0.851380328 |
| logarithm_glrlm_RunLengthNonUniformity           | 0.999816664 |
| logarithm_glrlm_RunLengthNonUniformityNormalized | 0.895537431 |
| logarithm_glrlm_RunPercentage                    | 0.906707889 |
| logarithm_glrlm_RunVariance                      | 0.930203093 |
| logarithm_glrlm_ShortRunEmphasis                 | 0.900341607 |
| logarithm_glrlm_ShortRunHighGrayLevelEmphasis    | 0.996528362 |
| logarithm_glrlm_ShortRunLowGrayLevelEmphasis     | 0.978407147 |
| logarithm_glszm_GrayLevelNonUniformity           | 0.99994506  |
| logarithm_glszm_GrayLevelNonUniformityNormalized | 0.966658732 |
| logarithm_glszm_GrayLevelVariance                | 0.944612676 |
| logarithm_glszm_HighGrayLevelZoneEmphasis        | 0.99679844  |
| logarithm_glszm_LargeAreaEmphasis                | 0.995700722 |
| logarithm_glszm_LargeAreaHighGrayLevelEmphasis   | 0.990889725 |
| logarithm_glszm_LargeAreaLowGrayLevelEmphasis    | 0.999583376 |
| logarithm_glszm_LowGrayLevelZoneEmphasis         | 0.985540269 |
| logarithm_glszm_SizeZoneNonUniformity            | 0.999249131 |
| logarithm_glszm_SizeZoneNonUniformityNormalized  | 0.959077632 |
| logarithm_glszm_SmallAreaEmphasis                | 0.963896574 |
| logarithm_glszm_SmallAreaHighGrayLevelEmphasis   | 0.996589851 |
| logarithm_glszm_SmallAreaLowGrayLevelEmphasis    | 0.987145342 |
| logarithm_glszm_ZoneEntropy                      | 0.925902696 |
| logarithm_glszm_ZonePercentage                   | 0.886990754 |
| logarithm_glszm_ZoneVariance                     | 0.995715571 |
| logarithm_ngtdm_Busyness                         | 0.995745222 |
| logarithm_ngtdm_Coarseness                       | 0.979808641 |
| logarithm_ngtdm_Complexity                       | 0.966370307 |
| logarithm_ngtdm_Contrast                         | 0.990035457 |

---

---

|                                                            |             |
|------------------------------------------------------------|-------------|
| logarithm_ngtdm_Strength                                   | 0.933321415 |
| log-sigma-0-5-mm-3D_firstorder_10Percentile                | 0.983702028 |
| log-sigma-0-5-mm-3D_firstorder_90Percentile                | 0.98591472  |
| log-sigma-0-5-mm-3D_firstorder_Energy                      | 0.997832352 |
| log-sigma-0-5-mm-3D_firstorder_Entropy                     | 0.969811042 |
| log-sigma-0-5-mm-3D_firstorder_InterquartileRange          | 0.983198395 |
| log-sigma-0-5-mm-3D_firstorder_Kurtosis                    | 0.985755326 |
| log-sigma-0-5-mm-3D_firstorder_Maximum                     | 0.862061284 |
| log-sigma-0-5-mm-3D_firstorder_Mean                        | 0.989871745 |
| log-sigma-0-5-mm-3D_firstorder_MeanAbsoluteDeviation       | 0.977737506 |
| log-sigma-0-5-mm-3D_firstorder_Median                      | 0.984897839 |
| log-sigma-0-5-mm-3D_firstorder_Minimum                     | 0.950539464 |
| log-sigma-0-5-mm-3D_firstorder_Range                       | 0.883749769 |
| log-sigma-0-5-mm-3D_firstorder_RobustMeanAbsoluteDeviation | 0.98239489  |
| log-sigma-0-5-mm-3D_firstorder_RootMeanSquared             | 0.978736696 |
| log-sigma-0-5-mm-3D_firstorder_Skewness                    | 0.974188396 |
| log-sigma-0-5-mm-3D_firstorder_TotalEnergy                 | 0.997832352 |
| log-sigma-0-5-mm-3D_firstorder_Uniformity                  | 0.983117171 |
| log-sigma-0-5-mm-3D_firstorder_Variance                    | 0.97205611  |
| log-sigma-0-5-mm-3D_glcm_Autocorrelation                   | 0.968177622 |
| log-sigma-0-5-mm-3D_glcm_ClusterProminence                 | 0.991151128 |
| log-sigma-0-5-mm-3D_glcm_ClusterShade                      | 0.994251268 |
| log-sigma-0-5-mm-3D_glcm_ClusterTendency                   | 0.97786455  |
| log-sigma-0-5-mm-3D_glcm_Contrast                          | 0.97505409  |
| log-sigma-0-5-mm-3D_glcm_Correlation                       | 0.947490522 |
| log-sigma-0-5-mm-3D_glcm_DifferenceAverage                 | 0.972799185 |
| log-sigma-0-5-mm-3D_glcm_DifferenceEntropy                 | 0.966977548 |
| log-sigma-0-5-mm-3D_glcm_DifferenceVariance                | 0.966023757 |
| log-sigma-0-5-mm-3D_glcm_Id                                | 0.974677438 |

---

---

|                                                               |             |
|---------------------------------------------------------------|-------------|
| log-sigma-0-5-mm-3D_glcm_Idm                                  | 0.97544613  |
| log-sigma-0-5-mm-3D_glcm_Idmn                                 | 0.954995479 |
| log-sigma-0-5-mm-3D_glcm_Idn                                  | 0.9772301   |
| log-sigma-0-5-mm-3D_glcm_Imc1                                 | 0.987290579 |
| log-sigma-0-5-mm-3D_glcm_Imc2                                 | 0.975680731 |
| log-sigma-0-5-mm-3D_glcm_InverseVariance                      | 0.977219143 |
| log-sigma-0-5-mm-3D_glcm_JointAverage                         | 0.96125629  |
| log-sigma-0-5-mm-3D_glcm_JointEnergy                          | 0.979227657 |
| log-sigma-0-5-mm-3D_glcm_JointEntropy                         | 0.968277772 |
| log-sigma-0-5-mm-3D_glcm_MaximumProbability                   | 0.970021537 |
| log-sigma-0-5-mm-3D_glcm_SumAverage                           | 0.96125629  |
| log-sigma-0-5-mm-3D_glcm_SumEntropy                           | 0.975379836 |
| log-sigma-0-5-mm-3D_glcm_SumSquares                           | 0.976149802 |
| log-sigma-0-5-mm-3D_gldm_DependenceEntropy                    | 0.942272019 |
| log-sigma-0-5-mm-3D_gldm_DependenceNonUniformity              | 0.999922701 |
| log-sigma-0-5-mm-3D_gldm_DependenceNonUniformityNormalized    | 0.982324119 |
| log-sigma-0-5-mm-3D_gldm_DependenceVariance                   | 0.979244824 |
| log-sigma-0-5-mm-3D_gldm_GrayLevelNonUniformity               | 0.999966443 |
| log-sigma-0-5-mm-3D_gldm_GrayLevelVariance                    | 0.972022435 |
| log-sigma-0-5-mm-3D_gldm_HighGrayLevelEmphasis                | 0.965036978 |
| log-sigma-0-5-mm-3D_gldm_LargeDependenceEmphasis              | 0.980011638 |
| log-sigma-0-5-mm-3D_gldm_LargeDependenceHighGrayLevelEmphasis | 0.989135501 |
| log-sigma-0-5-mm-3D_gldm_LargeDependenceLowGrayLevelEmphasis  | 0.926912766 |
| log-sigma-0-5-mm-3D_gldm_LowGrayLevelEmphasis                 | 0.936315081 |
| log-sigma-0-5-mm-3D_gldm_SmallDependenceEmphasis              | 0.957313885 |
| log-sigma-0-5-mm-3D_gldm_SmallDependenceHighGrayLevelEmphasis | 0.96337767  |
| log-sigma-0-5-mm-3D_gldm_SmallDependenceLowGrayLevelEmphasis  | 0.935579126 |
| log-sigma-0-5-mm-3D_glrIm_GrayLevelNonUniformity              | 0.999957108 |
| log-sigma-0-5-mm-3D_glrIm_GrayLevelNonUniformityNormalized    | 0.983567834 |

---

---

|                                                            |             |
|------------------------------------------------------------|-------------|
| log-sigma-0-5-mm-3D_glrlm_GrayLevelVariance                | 0.967494321 |
| log-sigma-0-5-mm-3D_glrlm_HighGrayLevelRunEmphasis         | 0.963525779 |
| log-sigma-0-5-mm-3D_glrlm_LongRunEmphasis                  | 0.983009193 |
| log-sigma-0-5-mm-3D_glrlm_LongRunHighGrayLevelEmphasis     | 0.985038199 |
| log-sigma-0-5-mm-3D_glrlm_LongRunLowGrayLevelEmphasis      | 0.909719742 |
| log-sigma-0-5-mm-3D_glrlm_LowGrayLevelRunEmphasis          | 0.927157143 |
| log-sigma-0-5-mm-3D_glrlm_RunEntropy                       | 0.946998016 |
| log-sigma-0-5-mm-3D_glrlm_RunLengthNonUniformity           | 0.999753218 |
| log-sigma-0-5-mm-3D_glrlm_RunLengthNonUniformityNormalized | 0.976856587 |
| log-sigma-0-5-mm-3D_glrlm_RunPercentage                    | 0.9784383   |
| log-sigma-0-5-mm-3D_glrlm_RunVariance                      | 0.984133796 |
| log-sigma-0-5-mm-3D_glrlm_ShortRunEmphasis                 | 0.978087501 |
| log-sigma-0-5-mm-3D_glrlm_ShortRunHighGrayLevelEmphasis    | 0.960981022 |
| log-sigma-0-5-mm-3D_glrlm_ShortRunLowGrayLevelEmphasis     | 0.929621465 |
| log-sigma-0-5-mm-3D_glszm_GrayLevelNonUniformity           | 0.999971117 |
| log-sigma-0-5-mm-3D_glszm_GrayLevelNonUniformityNormalized | 0.93657243  |
| log-sigma-0-5-mm-3D_glszm_GrayLevelVariance                | 0.900358902 |
| log-sigma-0-5-mm-3D_glszm_HighGrayLevelZoneEmphasis        | 0.938982304 |
| log-sigma-0-5-mm-3D_glszm_LargeAreaEmphasis                | 0.999945128 |
| log-sigma-0-5-mm-3D_glszm_LargeAreaHighGrayLevelEmphasis   | 0.999661378 |
| log-sigma-0-5-mm-3D_glszm_LargeAreaLowGrayLevelEmphasis    | 0.999427666 |
| log-sigma-0-5-mm-3D_glszm_LowGrayLevelZoneEmphasis         | 0.891923456 |
| log-sigma-0-5-mm-3D_glszm_SizeZoneNonUniformity            | 0.999490556 |
| log-sigma-0-5-mm-3D_glszm_SizeZoneNonUniformityNormalized  | 0.835477938 |
| log-sigma-0-5-mm-3D_glszm_SmallAreaEmphasis                | 0.838931084 |
| log-sigma-0-5-mm-3D_glszm_SmallAreaHighGrayLevelEmphasis   | 0.928968244 |
| log-sigma-0-5-mm-3D_glszm_SmallAreaLowGrayLevelEmphasis    | 0.900894373 |
| log-sigma-0-5-mm-3D_glszm_ZoneEntropy                      | 0.8977055   |
| log-sigma-0-5-mm-3D_glszm_ZonePercentage                   | 0.958306589 |

---



---

|                                                            |             |
|------------------------------------------------------------|-------------|
| log-sigma-0-5-mm-3D_glszm_ZoneVariance                     | 0.999945413 |
| log-sigma-0-5-mm-3D_ngtdm_Busyness                         | 0.996109978 |
| log-sigma-0-5-mm-3D_ngtdm_Coarseness                       | 0.992572158 |
| log-sigma-0-5-mm-3D_ngtdm_Complexity                       | 0.975551391 |
| log-sigma-0-5-mm-3D_ngtdm_Contrast                         | 0.987000494 |
| log-sigma-0-5-mm-3D_ngtdm_Strength                         | 0.974361547 |
| log-sigma-1-5-mm-3D_firstorder_10Percentile                | 0.9920401   |
| log-sigma-1-5-mm-3D_firstorder_90Percentile                | 0.905815888 |
| log-sigma-1-5-mm-3D_firstorder_Energy                      | 0.997181048 |
| log-sigma-1-5-mm-3D_firstorder_Entropy                     | 0.979682644 |
| log-sigma-1-5-mm-3D_firstorder_InterquartileRange          | 0.961088526 |
| log-sigma-1-5-mm-3D_firstorder_Kurtosis                    | 0.995242449 |
| log-sigma-1-5-mm-3D_firstorder_Maximum                     | 0.867269737 |
| log-sigma-1-5-mm-3D_firstorder_Mean                        | 0.98018452  |
| log-sigma-1-5-mm-3D_firstorder_MeanAbsoluteDeviation       | 0.963062764 |
| log-sigma-1-5-mm-3D_firstorder_Median                      | 0.985939672 |
| log-sigma-1-5-mm-3D_firstorder_Minimum                     | 0.956292675 |
| log-sigma-1-5-mm-3D_firstorder_Range                       | 0.885402274 |
| log-sigma-1-5-mm-3D_firstorder_RobustMeanAbsoluteDeviation | 0.967726233 |
| log-sigma-1-5-mm-3D_firstorder_RootMeanSquared             | 0.989684231 |
| log-sigma-1-5-mm-3D_firstorder_Skewness                    | 0.984011269 |
| log-sigma-1-5-mm-3D_firstorder_TotalEnergy                 | 0.997181048 |
| log-sigma-1-5-mm-3D_firstorder_Uniformity                  | 0.994195846 |
| log-sigma-1-5-mm-3D_firstorder_Variance                    | 0.958889541 |
| log-sigma-1-5-mm-3D_glcm_Autocorrelation                   | 0.967881448 |
| log-sigma-1-5-mm-3D_glcm_ClusterProminence                 | 0.961469133 |
| log-sigma-1-5-mm-3D_glcm_ClusterShade                      | 0.969176302 |
| log-sigma-1-5-mm-3D_glcm_ClusterTendency                   | 0.965143402 |
| log-sigma-1-5-mm-3D_glcm_Contrast                          | 0.953601564 |

---

---

|                                                               |             |
|---------------------------------------------------------------|-------------|
| log-sigma-1-5-mm-3D_glcm_Correlation                          | 0.926615946 |
| log-sigma-1-5-mm-3D_glcm_DifferenceAverage                    | 0.964848525 |
| log-sigma-1-5-mm-3D_glcm_DifferenceEntropy                    | 0.967770579 |
| log-sigma-1-5-mm-3D_glcm_DifferenceVariance                   | 0.941914931 |
| log-sigma-1-5-mm-3D_glcm_Id                                   | 0.984058727 |
| log-sigma-1-5-mm-3D_glcm_Idm                                  | 0.984025565 |
| log-sigma-1-5-mm-3D_glcm_Idmn                                 | 0.975173864 |
| log-sigma-1-5-mm-3D_glcm_Idn                                  | 0.982005361 |
| log-sigma-1-5-mm-3D_glcm_Imc1                                 | 0.968859133 |
| log-sigma-1-5-mm-3D_glcm_Imc2                                 | 0.916533584 |
| log-sigma-1-5-mm-3D_glcm_InverseVariance                      | 0.933840071 |
| log-sigma-1-5-mm-3D_glcm_JointAverage                         | 0.950483878 |
| log-sigma-1-5-mm-3D_glcm_JointEnergy                          | 0.997723904 |
| log-sigma-1-5-mm-3D_glcm_JointEntropy                         | 0.982404127 |
| log-sigma-1-5-mm-3D_glcm_MaximumProbability                   | 0.997862939 |
| log-sigma-1-5-mm-3D_glcm_SumAverage                           | 0.950483878 |
| log-sigma-1-5-mm-3D_glcm_SumEntropy                           | 0.983257073 |
| log-sigma-1-5-mm-3D_glcm_SumSquares                           | 0.966290374 |
| log-sigma-1-5-mm-3D_gldm_DependenceEntropy                    | 0.971253065 |
| log-sigma-1-5-mm-3D_gldm_DependenceNonUniformity              | 0.999776002 |
| log-sigma-1-5-mm-3D_gldm_DependenceNonUniformityNormalized    | 0.983886172 |
| log-sigma-1-5-mm-3D_gldm_DependenceVariance                   | 0.995912879 |
| log-sigma-1-5-mm-3D_gldm_GrayLevelNonUniformity               | 0.999989161 |
| log-sigma-1-5-mm-3D_gldm_GrayLevelVariance                    | 0.959589016 |
| log-sigma-1-5-mm-3D_gldm_HighGrayLevelEmphasis                | 0.964321225 |
| log-sigma-1-5-mm-3D_gldm_LargeDependenceEmphasis              | 0.997197628 |
| log-sigma-1-5-mm-3D_gldm_LargeDependenceHighGrayLevelEmphasis | 0.996369187 |
| log-sigma-1-5-mm-3D_gldm_LargeDependenceLowGrayLevelEmphasis  | 0.806360982 |
| log-sigma-1-5-mm-3D_gldm_LowGrayLevelEmphasis                 | 0.894163563 |

---

---

|                                                               |             |
|---------------------------------------------------------------|-------------|
| log-sigma-1-5-mm-3D_gldm_SmallDependenceEmphasis              | 0.957435615 |
| log-sigma-1-5-mm-3D_gldm_SmallDependenceHighGrayLevelEmphasis | 0.947322406 |
| log-sigma-1-5-mm-3D_gldm_SmallDependenceLowGrayLevelEmphasis  | 0.930814619 |
| log-sigma-1-5-mm-3D_glrlm_GrayLevelNonUniformity              | 0.999901431 |
| log-sigma-1-5-mm-3D_glrlm_GrayLevelNonUniformityNormalized    | 0.982546367 |
| log-sigma-1-5-mm-3D_glrlm_GrayLevelVariance                   | 0.954311392 |
| log-sigma-1-5-mm-3D_glrlm_HighGrayLevelRunEmphasis            | 0.960649802 |
| log-sigma-1-5-mm-3D_glrlm_LongRunEmphasis                     | 0.998443518 |
| log-sigma-1-5-mm-3D_glrlm_LongRunHighGrayLevelEmphasis        | 0.997038796 |
| log-sigma-1-5-mm-3D_glrlm_LongRunLowGrayLevelEmphasis         | 0.841043994 |
| log-sigma-1-5-mm-3D_glrlm_LowGrayLevelRunEmphasis             | 0.89165216  |
| log-sigma-1-5-mm-3D_glrlm_RunEntropy                          | 0.966145039 |
| log-sigma-1-5-mm-3D_glrlm_RunLengthNonUniformity              | 0.9982676   |
| log-sigma-1-5-mm-3D_glrlm_RunLengthNonUniformityNormalized    | 0.988789023 |
| log-sigma-1-5-mm-3D_glrlm_RunPercentage                       | 0.993293216 |
| log-sigma-1-5-mm-3D_glrlm_RunVariance                         | 0.998805311 |
| log-sigma-1-5-mm-3D_glrlm_ShortRunEmphasis                    | 0.99240037  |
| log-sigma-1-5-mm-3D_glrlm_ShortRunHighGrayLevelEmphasis       | 0.948944141 |
| log-sigma-1-5-mm-3D_glrlm_ShortRunLowGrayLevelEmphasis        | 0.900481367 |
| log-sigma-1-5-mm-3D_glszm_GrayLevelNonUniformity              | 0.996110231 |
| log-sigma-1-5-mm-3D_glszm_GrayLevelNonUniformityNormalized    | 0.957158521 |
| log-sigma-1-5-mm-3D_glszm_GrayLevelVariance                   | 0.943445979 |
| log-sigma-1-5-mm-3D_glszm_HighGrayLevelZoneEmphasis           | 0.94310796  |
| log-sigma-1-5-mm-3D_glszm_LargeAreaEmphasis                   | 0.999974738 |
| log-sigma-1-5-mm-3D_glszm_LargeAreaHighGrayLevelEmphasis      | 0.999988143 |
| log-sigma-1-5-mm-3D_glszm_LargeAreaLowGrayLevelEmphasis       | 0.999872272 |
| log-sigma-1-5-mm-3D_glszm_LowGrayLevelZoneEmphasis            | 0.921462186 |
| log-sigma-1-5-mm-3D_glszm_SizeZoneNonUniformity               | 0.989526621 |
| log-sigma-1-5-mm-3D_glszm_SizeZoneNonUniformityNormalized     | 0.907272878 |

---

---

|                                                            |             |
|------------------------------------------------------------|-------------|
| log-sigma-1-5-mm-3D_glszm_SmallAreaEmphasis                | 0.921140825 |
| log-sigma-1-5-mm-3D_glszm_SmallAreaHighGrayLevelEmphasis   | 0.932468087 |
| log-sigma-1-5-mm-3D_glszm_SmallAreaLowGrayLevelEmphasis    | 0.860168629 |
| log-sigma-1-5-mm-3D_glszm_ZoneEntropy                      | 0.9675509   |
| log-sigma-1-5-mm-3D_glszm_ZonePercentage                   | 0.95240678  |
| log-sigma-1-5-mm-3D_glszm_ZoneVariance                     | 0.999975091 |
| log-sigma-1-5-mm-3D_ngtdm_Busyness                         | 0.998854689 |
| log-sigma-1-5-mm-3D_ngtdm_Coarseness                       | 0.992922169 |
| log-sigma-1-5-mm-3D_ngtdm_Complexity                       | 0.986392748 |
| log-sigma-1-5-mm-3D_ngtdm_Contrast                         | 0.997379639 |
| log-sigma-1-5-mm-3D_ngtdm_Strength                         | 0.992211091 |
| log-sigma-2-5-mm-3D_firstorder_10Percentile                | 0.974166777 |
| log-sigma-2-5-mm-3D_firstorder_90Percentile                | 0.942325132 |
| log-sigma-2-5-mm-3D_firstorder_Energy                      | 0.997564303 |
| log-sigma-2-5-mm-3D_firstorder_Entropy                     | 0.983404585 |
| log-sigma-2-5-mm-3D_firstorder_InterquartileRange          | 0.934050331 |
| log-sigma-2-5-mm-3D_firstorder_Kurtosis                    | 0.984291032 |
| log-sigma-2-5-mm-3D_firstorder_Maximum                     | 0.804745919 |
| log-sigma-2-5-mm-3D_firstorder_Mean                        | 0.962754168 |
| log-sigma-2-5-mm-3D_firstorder_MeanAbsoluteDeviation       | 0.952388802 |
| log-sigma-2-5-mm-3D_firstorder_Median                      | 0.962816942 |
| log-sigma-2-5-mm-3D_firstorder_Minimum                     | 0.976149038 |
| log-sigma-2-5-mm-3D_firstorder_Range                       | 0.901900376 |
| log-sigma-2-5-mm-3D_firstorder_RobustMeanAbsoluteDeviation | 0.938357887 |
| log-sigma-2-5-mm-3D_firstorder_RootMeanSquared             | 0.97874006  |
| log-sigma-2-5-mm-3D_firstorder_Skewness                    | 0.984226899 |
| log-sigma-2-5-mm-3D_firstorder_TotalEnergy                 | 0.997564303 |
| log-sigma-2-5-mm-3D_firstorder_Uniformity                  | 0.992631036 |
| log-sigma-2-5-mm-3D_firstorder_Variance                    | 0.940906487 |

---

---

|                                                            |             |
|------------------------------------------------------------|-------------|
| log-sigma-2-5-mm-3D_glcm_Autocorrelation                   | 0.978636949 |
| log-sigma-2-5-mm-3D_glcm_ClusterProminence                 | 0.916921707 |
| log-sigma-2-5-mm-3D_glcm_ClusterShade                      | 0.889907728 |
| log-sigma-2-5-mm-3D_glcm_ClusterTendency                   | 0.942651146 |
| log-sigma-2-5-mm-3D_glcm_Contrast                          | 0.949707832 |
| log-sigma-2-5-mm-3D_glcm_Correlation                       | 0.985080651 |
| log-sigma-2-5-mm-3D_glcm_DifferenceAverage                 | 0.967667563 |
| log-sigma-2-5-mm-3D_glcm_DifferenceEntropy                 | 0.981823686 |
| log-sigma-2-5-mm-3D_glcm_DifferenceVariance                | 0.956350791 |
| log-sigma-2-5-mm-3D_glcm_Id                                | 0.984996301 |
| log-sigma-2-5-mm-3D_glcm_Idm                               | 0.9844777   |
| log-sigma-2-5-mm-3D_glcm_Idmn                              | 0.967407689 |
| log-sigma-2-5-mm-3D_glcm_Idn                               | 0.972792651 |
| log-sigma-2-5-mm-3D_glcm_Imc1                              | 0.989286067 |
| log-sigma-2-5-mm-3D_glcm_Imc2                              | 0.98549903  |
| log-sigma-2-5-mm-3D_glcm_InverseVariance                   | 0.959376877 |
| log-sigma-2-5-mm-3D_glcm_JointAverage                      | 0.983272869 |
| log-sigma-2-5-mm-3D_glcm_JointEnergy                       | 0.998615023 |
| log-sigma-2-5-mm-3D_glcm_JointEntropy                      | 0.986863021 |
| log-sigma-2-5-mm-3D_glcm_MaximumProbability                | 0.997331515 |
| log-sigma-2-5-mm-3D_glcm_SumAverage                        | 0.983272869 |
| log-sigma-2-5-mm-3D_glcm_SumEntropy                        | 0.984613279 |
| log-sigma-2-5-mm-3D_glcm_SumSquares                        | 0.942642358 |
| log-sigma-2-5-mm-3D_gldm_DependenceEntropy                 | 0.964307408 |
| log-sigma-2-5-mm-3D_gldm_DependenceNonUniformity           | 0.999900829 |
| log-sigma-2-5-mm-3D_gldm_DependenceNonUniformityNormalized | 0.957001938 |
| log-sigma-2-5-mm-3D_gldm_DependenceVariance                | 0.994990544 |
| log-sigma-2-5-mm-3D_gldm_GrayLevelNonUniformity            | 0.999972339 |
| log-sigma-2-5-mm-3D_gldm_GrayLevelVariance                 | 0.941928915 |

---

---

|                                                               |             |
|---------------------------------------------------------------|-------------|
| log-sigma-2-5-mm-3D_gldm_HighGrayLevelEmphasis                | 0.973876701 |
| log-sigma-2-5-mm-3D_gldm_LargeDependenceEmphasis              | 0.997347374 |
| log-sigma-2-5-mm-3D_gldm_LargeDependenceHighGrayLevelEmphasis | 0.997765105 |
| log-sigma-2-5-mm-3D_gldm_LargeDependenceLowGrayLevelEmphasis  | 0.936388013 |
| log-sigma-2-5-mm-3D_gldm_LowGrayLevelEmphasis                 | 0.98067216  |
| log-sigma-2-5-mm-3D_gldm_SmallDependenceEmphasis              | 0.96184293  |
| log-sigma-2-5-mm-3D_gldm_SmallDependenceHighGrayLevelEmphasis | 0.948437564 |
| log-sigma-2-5-mm-3D_gldm_SmallDependenceLowGrayLevelEmphasis  | 0.985801199 |
| log-sigma-2-5-mm-3D_glrlm_GrayLevelNonUniformity              | 0.999673447 |
| log-sigma-2-5-mm-3D_glrlm_GrayLevelNonUniformityNormalized    | 0.985319975 |
| log-sigma-2-5-mm-3D_glrlm_GrayLevelVariance                   | 0.946902402 |
| log-sigma-2-5-mm-3D_glrlm_HighGrayLevelRunEmphasis            | 0.972092621 |
| log-sigma-2-5-mm-3D_glrlm_LongRunEmphasis                     | 0.999199623 |
| log-sigma-2-5-mm-3D_glrlm_LongRunHighGrayLevelEmphasis        | 0.998478947 |
| log-sigma-2-5-mm-3D_glrlm_LongRunLowGrayLevelEmphasis         | 0.97541391  |
| log-sigma-2-5-mm-3D_glrlm_LowGrayLevelRunEmphasis             | 0.984864002 |
| log-sigma-2-5-mm-3D_glrlm_RunEntropy                          | 0.990632444 |
| log-sigma-2-5-mm-3D_glrlm_RunLengthNonUniformity              | 0.998132406 |
| log-sigma-2-5-mm-3D_glrlm_RunLengthNonUniformityNormalized    | 0.987776928 |
| log-sigma-2-5-mm-3D_glrlm_RunPercentage                       | 0.993225615 |
| log-sigma-2-5-mm-3D_glrlm_RunVariance                         | 0.999406384 |
| log-sigma-2-5-mm-3D_glrlm_ShortRunEmphasis                    | 0.991842419 |
| log-sigma-2-5-mm-3D_glrlm_ShortRunHighGrayLevelEmphasis       | 0.969053833 |
| log-sigma-2-5-mm-3D_glrlm_ShortRunLowGrayLevelEmphasis        | 0.98823138  |
| log-sigma-2-5-mm-3D_glszm_GrayLevelNonUniformity              | 0.994946979 |
| log-sigma-2-5-mm-3D_glszm_GrayLevelNonUniformityNormalized    | 0.976397849 |
| log-sigma-2-5-mm-3D_glszm_GrayLevelVariance                   | 0.962803101 |
| log-sigma-2-5-mm-3D_glszm_HighGrayLevelZoneEmphasis           | 0.98149658  |
| log-sigma-2-5-mm-3D_glszm_LargeAreaEmphasis                   | 0.999983664 |

---

---

|                                                            |             |
|------------------------------------------------------------|-------------|
| log-sigma-2-5-mm-3D_glszm_LargeAreaHighGrayLevelEmphasis   | 0.999970141 |
| log-sigma-2-5-mm-3D_glszm_LargeAreaLowGrayLevelEmphasis    | 0.999975461 |
| log-sigma-2-5-mm-3D_glszm_LowGrayLevelZoneEmphasis         | 0.99613234  |
| log-sigma-2-5-mm-3D_glszm_SizeZoneNonUniformity            | 0.98991653  |
| log-sigma-2-5-mm-3D_glszm_SizeZoneNonUniformityNormalized  | 0.919780135 |
| log-sigma-2-5-mm-3D_glszm_SmallAreaEmphasis                | 0.940490442 |
| log-sigma-2-5-mm-3D_glszm_SmallAreaHighGrayLevelEmphasis   | 0.97230488  |
| log-sigma-2-5-mm-3D_glszm_SmallAreaLowGrayLevelEmphasis    | 0.973626194 |
| log-sigma-2-5-mm-3D_glszm_ZoneEntropy                      | 0.971017009 |
| log-sigma-2-5-mm-3D_glszm_ZonePercentage                   | 0.957979989 |
| log-sigma-2-5-mm-3D_glszm_ZoneVariance                     | 0.999983919 |
| log-sigma-2-5-mm-3D_ngtdm_Busyness                         | 0.997890876 |
| log-sigma-2-5-mm-3D_ngtdm_Coarseness                       | 0.986653885 |
| log-sigma-2-5-mm-3D_ngtdm_Complexity                       | 0.984840748 |
| log-sigma-2-5-mm-3D_ngtdm_Contrast                         | 0.986902114 |
| log-sigma-2-5-mm-3D_ngtdm_Strength                         | 0.979380283 |
| log-sigma-3-5-mm-3D_firstorder_10Percentile                | 0.9707733   |
| log-sigma-3-5-mm-3D_firstorder_90Percentile                | 0.922183463 |
| log-sigma-3-5-mm-3D_firstorder_Energy                      | 0.996345223 |
| log-sigma-3-5-mm-3D_firstorder_Entropy                     | 0.981748161 |
| log-sigma-3-5-mm-3D_firstorder_InterquartileRange          | 0.968562577 |
| log-sigma-3-5-mm-3D_firstorder_Kurtosis                    | 0.976381786 |
| log-sigma-3-5-mm-3D_firstorder_Maximum                     | 0.779582874 |
| log-sigma-3-5-mm-3D_firstorder_Mean                        | 0.958824011 |
| log-sigma-3-5-mm-3D_firstorder_MeanAbsoluteDeviation       | 0.969846185 |
| log-sigma-3-5-mm-3D_firstorder_Median                      | 0.962970783 |
| log-sigma-3-5-mm-3D_firstorder_Minimum                     | 0.966395751 |
| log-sigma-3-5-mm-3D_firstorder_Range                       | 0.912489046 |
| log-sigma-3-5-mm-3D_firstorder_RobustMeanAbsoluteDeviation | 0.968960479 |

---

---

|                                                |             |
|------------------------------------------------|-------------|
| log-sigma-3-5-mm-3D_firstorder_RootMeanSquared | 0.984495189 |
| log-sigma-3-5-mm-3D_firstorder_Skewness        | 0.948895865 |
| log-sigma-3-5-mm-3D_firstorder_TotalEnergy     | 0.996345223 |
| log-sigma-3-5-mm-3D_firstorder_Uniformity      | 0.991610517 |
| log-sigma-3-5-mm-3D_firstorder_Variance        | 0.949858992 |
| log-sigma-3-5-mm-3D_glcm_Autocorrelation       | 0.952005664 |
| log-sigma-3-5-mm-3D_glcm_ClusterProminence     | 0.89189499  |
| log-sigma-3-5-mm-3D_glcm_ClusterShade          | 0.934122104 |
| log-sigma-3-5-mm-3D_glcm_ClusterTendency       | 0.947926339 |
| log-sigma-3-5-mm-3D_glcm_Contrast              | 0.948661229 |
| log-sigma-3-5-mm-3D_glcm_Correlation           | 0.954821024 |
| log-sigma-3-5-mm-3D_glcm_DifferenceAverage     | 0.974024429 |
| log-sigma-3-5-mm-3D_glcm_DifferenceEntropy     | 0.986212274 |
| log-sigma-3-5-mm-3D_glcm_DifferenceVariance    | 0.957939462 |
| log-sigma-3-5-mm-3D_glcm_Id                    | 0.990966779 |
| log-sigma-3-5-mm-3D_glcm_Idm                   | 0.990856719 |
| log-sigma-3-5-mm-3D_glcm_Idmn                  | 0.950732771 |
| log-sigma-3-5-mm-3D_glcm_Idn                   | 0.964756518 |
| log-sigma-3-5-mm-3D_glcm_Imc1                  | 0.9733145   |
| log-sigma-3-5-mm-3D_glcm_Imc2                  | 0.934584934 |
| log-sigma-3-5-mm-3D_glcm_InverseVariance       | 0.964760701 |
| log-sigma-3-5-mm-3D_glcm_JointAverage          | 0.96662506  |
| log-sigma-3-5-mm-3D_glcm_JointEnergy           | 0.998680524 |
| log-sigma-3-5-mm-3D_glcm_JointEntropy          | 0.989702144 |
| log-sigma-3-5-mm-3D_glcm_MaximumProbability    | 0.99721089  |
| log-sigma-3-5-mm-3D_glcm_SumAverage            | 0.96662506  |
| log-sigma-3-5-mm-3D_glcm_SumEntropy            | 0.982833513 |
| log-sigma-3-5-mm-3D_glcm_SumSquares            | 0.949994232 |
| log-sigma-3-5-mm-3D_gldm_DependenceEntropy     | 0.981114303 |

---



---

|                                                               |             |
|---------------------------------------------------------------|-------------|
| log-sigma-3-5-mm-3D_gldm_DependenceNonUniformity              | 0.999921825 |
| log-sigma-3-5-mm-3D_gldm_DependenceNonUniformityNormalized    | 0.971307722 |
| log-sigma-3-5-mm-3D_gldm_DependenceVariance                   | 0.996047326 |
| log-sigma-3-5-mm-3D_gldm_GrayLevelNonUniformity               | 0.999949604 |
| log-sigma-3-5-mm-3D_gldm_GrayLevelVariance                    | 0.949508562 |
| log-sigma-3-5-mm-3D_gldm_HighGrayLevelEmphasis                | 0.948075132 |
| log-sigma-3-5-mm-3D_gldm_LargeDependenceEmphasis              | 0.998270127 |
| log-sigma-3-5-mm-3D_gldm_LargeDependenceHighGrayLevelEmphasis | 0.997295642 |
| log-sigma-3-5-mm-3D_gldm_LargeDependenceLowGrayLevelEmphasis  | 0.993801248 |
| log-sigma-3-5-mm-3D_gldm_LowGrayLevelEmphasis                 | 0.995394523 |
| log-sigma-3-5-mm-3D_gldm_SmallDependenceEmphasis              | 0.972417615 |
| log-sigma-3-5-mm-3D_gldm_SmallDependenceHighGrayLevelEmphasis | 0.933066308 |
| log-sigma-3-5-mm-3D_gldm_SmallDependenceLowGrayLevelEmphasis  | 0.98529981  |
| log-sigma-3-5-mm-3D_glrIm_GrayLevelNonUniformity              | 0.99966032  |
| log-sigma-3-5-mm-3D_glrIm_GrayLevelNonUniformityNormalized    | 0.988602345 |
| log-sigma-3-5-mm-3D_glrIm_GrayLevelVariance                   | 0.950092124 |
| log-sigma-3-5-mm-3D_glrIm_HighGrayLevelRunEmphasis            | 0.946925557 |
| log-sigma-3-5-mm-3D_glrIm_LongRunEmphasis                     | 0.999545104 |
| log-sigma-3-5-mm-3D_glrIm_LongRunHighGrayLevelEmphasis        | 0.998865445 |
| log-sigma-3-5-mm-3D_glrIm_LongRunLowGrayLevelEmphasis         | 0.996170545 |
| log-sigma-3-5-mm-3D_glrIm_LowGrayLevelRunEmphasis             | 0.995906628 |
| log-sigma-3-5-mm-3D_glrIm_RunEntropy                          | 0.97859476  |
| log-sigma-3-5-mm-3D_glrIm_RunLengthNonUniformity              | 0.998261221 |
| log-sigma-3-5-mm-3D_glrIm_RunLengthNonUniformityNormalized    | 0.995489237 |
| log-sigma-3-5-mm-3D_glrIm_RunPercentage                       | 0.996547017 |
| log-sigma-3-5-mm-3D_glrIm_RunVariance                         | 0.999650824 |
| log-sigma-3-5-mm-3D_glrIm_ShortRunEmphasis                    | 0.996604799 |
| log-sigma-3-5-mm-3D_glrIm_ShortRunHighGrayLevelEmphasis       | 0.9483108   |
| log-sigma-3-5-mm-3D_glrIm_ShortRunLowGrayLevelEmphasis        | 0.99442931  |

---

---

|                                                            |             |
|------------------------------------------------------------|-------------|
| log-sigma-3-5-mm-3D_glszm_GrayLevelNonUniformity           | 0.996318871 |
| log-sigma-3-5-mm-3D_glszm_GrayLevelNonUniformityNormalized | 0.972083776 |
| log-sigma-3-5-mm-3D_glszm_GrayLevelVariance                | 0.927722541 |
| log-sigma-3-5-mm-3D_glszm_HighGrayLevelZoneEmphasis        | 0.944454227 |
| log-sigma-3-5-mm-3D_glszm_LargeAreaEmphasis                | 0.999975287 |
| log-sigma-3-5-mm-3D_glszm_LargeAreaHighGrayLevelEmphasis   | 0.999978444 |
| log-sigma-3-5-mm-3D_glszm_LargeAreaLowGrayLevelEmphasis    | 0.999938984 |
| log-sigma-3-5-mm-3D_glszm_LowGrayLevelZoneEmphasis         | 0.997109142 |
| log-sigma-3-5-mm-3D_glszm_SizeZoneNonUniformity            | 0.991575624 |
| log-sigma-3-5-mm-3D_glszm_SizeZoneNonUniformityNormalized  | 0.921558504 |
| log-sigma-3-5-mm-3D_glszm_SmallAreaEmphasis                | 0.93882532  |
| log-sigma-3-5-mm-3D_glszm_SmallAreaHighGrayLevelEmphasis   | 0.940572107 |
| log-sigma-3-5-mm-3D_glszm_SmallAreaLowGrayLevelEmphasis    | 0.971728101 |
| log-sigma-3-5-mm-3D_glszm_ZoneEntropy                      | 0.960664401 |
| log-sigma-3-5-mm-3D_glszm_ZonePercentage                   | 0.959609963 |
| log-sigma-3-5-mm-3D_glszm_ZoneVariance                     | 0.999975833 |
| log-sigma-3-5-mm-3D_ngtdm_Busyness                         | 0.997209291 |
| log-sigma-3-5-mm-3D_ngtdm_Coarseness                       | 0.993798832 |
| log-sigma-3-5-mm-3D_ngtdm_Complexity                       | 0.958063461 |
| log-sigma-3-5-mm-3D_ngtdm_Contrast                         | 0.970605756 |
| log-sigma-3-5-mm-3D_ngtdm_Strength                         | 0.98954419  |
| log-sigma-4-5-mm-3D_firstorder_10Percentile                | 0.958604689 |
| log-sigma-4-5-mm-3D_firstorder_90Percentile                | 0.908220723 |
| log-sigma-4-5-mm-3D_firstorder_Energy                      | 0.994843149 |
| log-sigma-4-5-mm-3D_firstorder_Entropy                     | 0.945088467 |
| log-sigma-4-5-mm-3D_firstorder_InterquartileRange          | 0.928594265 |
| log-sigma-4-5-mm-3D_firstorder_Kurtosis                    | 0.947631823 |
| log-sigma-4-5-mm-3D_firstorder_Maximum                     | 0.798130098 |
| log-sigma-4-5-mm-3D_firstorder_Mean                        | 0.955254269 |

---

---

|                                                            |             |
|------------------------------------------------------------|-------------|
| log-sigma-4-5-mm-3D_firstorder_MeanAbsoluteDeviation       | 0.930821536 |
| log-sigma-4-5-mm-3D_firstorder_Median                      | 0.964239145 |
| log-sigma-4-5-mm-3D_firstorder_Minimum                     | 0.953563175 |
| log-sigma-4-5-mm-3D_firstorder_Range                       | 0.910421853 |
| log-sigma-4-5-mm-3D_firstorder_RobustMeanAbsoluteDeviation | 0.928614184 |
| log-sigma-4-5-mm-3D_firstorder_RootMeanSquared             | 0.973266287 |
| log-sigma-4-5-mm-3D_firstorder_Skewness                    | 0.94244684  |
| log-sigma-4-5-mm-3D_firstorder_TotalEnergy                 | 0.994843149 |
| log-sigma-4-5-mm-3D_firstorder_Uniformity                  | 0.972709861 |
| log-sigma-4-5-mm-3D_firstorder_Variance                    | 0.933145695 |
| log-sigma-4-5-mm-3D_glcm_Autocorrelation                   | 0.925619336 |
| log-sigma-4-5-mm-3D_glcm_ClusterProminence                 | 0.943487647 |
| log-sigma-4-5-mm-3D_glcm_ClusterShade                      | 0.965384225 |
| log-sigma-4-5-mm-3D_glcm_ClusterTendency                   | 0.920388157 |
| log-sigma-4-5-mm-3D_glcm_Contrast                          | 0.962219406 |
| log-sigma-4-5-mm-3D_glcm_Correlation                       | 0.933157807 |
| log-sigma-4-5-mm-3D_glcm_DifferenceAverage                 | 0.973904121 |
| log-sigma-4-5-mm-3D_glcm_DifferenceEntropy                 | 0.977850271 |
| log-sigma-4-5-mm-3D_glcm_DifferenceVariance                | 0.964828777 |
| log-sigma-4-5-mm-3D_glcm_Id                                | 0.98455978  |
| log-sigma-4-5-mm-3D_glcm_Idm                               | 0.983378668 |
| log-sigma-4-5-mm-3D_glcm_Idmn                              | 0.951943794 |
| log-sigma-4-5-mm-3D_glcm_Idn                               | 0.976363387 |
| log-sigma-4-5-mm-3D_glcm_Imc1                              | 0.973279274 |
| log-sigma-4-5-mm-3D_glcm_Imc2                              | 0.8930247   |
| log-sigma-4-5-mm-3D_glcm_InverseVariance                   | 0.953159215 |
| log-sigma-4-5-mm-3D_glcm_JointAverage                      | 0.93182005  |
| log-sigma-4-5-mm-3D_glcm_JointEnergy                       | 0.994364414 |
| log-sigma-4-5-mm-3D_glcm_JointEntropy                      | 0.965580888 |

---

---

|                                                               |             |
|---------------------------------------------------------------|-------------|
| log-sigma-4-5-mm-3D_glcm_MaximumProbability                   | 0.988523017 |
| log-sigma-4-5-mm-3D_glcm_SumAverage                           | 0.93182005  |
| log-sigma-4-5-mm-3D_glcm_SumEntropy                           | 0.946324136 |
| log-sigma-4-5-mm-3D_glcm_SumSquares                           | 0.923186327 |
| log-sigma-4-5-mm-3D_gldm_DependenceEntropy                    | 0.972711666 |
| log-sigma-4-5-mm-3D_gldm_DependenceNonUniformity              | 0.999902829 |
| log-sigma-4-5-mm-3D_gldm_DependenceNonUniformityNormalized    | 0.966587708 |
| log-sigma-4-5-mm-3D_gldm_DependenceVariance                   | 0.994728476 |
| log-sigma-4-5-mm-3D_gldm_GrayLevelNonUniformity               | 0.999945699 |
| log-sigma-4-5-mm-3D_gldm_GrayLevelVariance                    | 0.932867324 |
| log-sigma-4-5-mm-3D_gldm_HighGrayLevelEmphasis                | 0.924224154 |
| log-sigma-4-5-mm-3D_gldm_LargeDependenceEmphasis              | 0.996755782 |
| log-sigma-4-5-mm-3D_gldm_LargeDependenceHighGrayLevelEmphasis | 0.995153542 |
| log-sigma-4-5-mm-3D_gldm_LargeDependenceLowGrayLevelEmphasis  | 0.960465385 |
| log-sigma-4-5-mm-3D_gldm_LowGrayLevelEmphasis                 | 0.974378362 |
| log-sigma-4-5-mm-3D_gldm_SmallDependenceEmphasis              | 0.958461565 |
| log-sigma-4-5-mm-3D_gldm_SmallDependenceHighGrayLevelEmphasis | 0.933862345 |
| log-sigma-4-5-mm-3D_gldm_SmallDependenceLowGrayLevelEmphasis  | 0.963604357 |
| log-sigma-4-5-mm-3D_glrlm_GrayLevelNonUniformity              | 0.999729668 |
| log-sigma-4-5-mm-3D_glrlm_GrayLevelNonUniformityNormalized    | 0.961931353 |
| log-sigma-4-5-mm-3D_glrlm_GrayLevelVariance                   | 0.930982053 |
| log-sigma-4-5-mm-3D_glrlm_HighGrayLevelRunEmphasis            | 0.923261423 |
| log-sigma-4-5-mm-3D_glrlm_LongRunEmphasis                     | 0.999556367 |
| log-sigma-4-5-mm-3D_glrlm_LongRunHighGrayLevelEmphasis        | 0.997576848 |
| log-sigma-4-5-mm-3D_glrlm_LongRunLowGrayLevelEmphasis         | 0.977691318 |
| log-sigma-4-5-mm-3D_glrlm_LowGrayLevelRunEmphasis             | 0.980128009 |
| log-sigma-4-5-mm-3D_glrlm_RunEntropy                          | 0.95822018  |
| log-sigma-4-5-mm-3D_glrlm_RunLengthNonUniformity              | 0.998324148 |
| log-sigma-4-5-mm-3D_glrlm_RunLengthNonUniformityNormalized    | 0.986876411 |

---

---

|                                                            |             |
|------------------------------------------------------------|-------------|
| log-sigma-4-5-mm-3D_glrlm_RunPercentage                    | 0.993164373 |
| log-sigma-4-5-mm-3D_glrlm_RunVariance                      | 0.999737628 |
| log-sigma-4-5-mm-3D_glrlm_ShortRunEmphasis                 | 0.990167544 |
| log-sigma-4-5-mm-3D_glrlm_ShortRunHighGrayLevelEmphasis    | 0.924865192 |
| log-sigma-4-5-mm-3D_glrlm_ShortRunLowGrayLevelEmphasis     | 0.98321323  |
| log-sigma-4-5-mm-3D_glszm_GrayLevelNonUniformity           | 0.995887146 |
| log-sigma-4-5-mm-3D_glszm_GrayLevelNonUniformityNormalized | 0.911548183 |
| log-sigma-4-5-mm-3D_glszm_GrayLevelVariance                | 0.915112523 |
| log-sigma-4-5-mm-3D_glszm_HighGrayLevelZoneEmphasis        | 0.934239117 |
| log-sigma-4-5-mm-3D_glszm_LargeAreaEmphasis                | 0.999977933 |
| log-sigma-4-5-mm-3D_glszm_LargeAreaHighGrayLevelEmphasis   | 0.999943693 |
| log-sigma-4-5-mm-3D_glszm_LargeAreaLowGrayLevelEmphasis    | 0.999934513 |
| log-sigma-4-5-mm-3D_glszm_LowGrayLevelZoneEmphasis         | 0.987923812 |
| log-sigma-4-5-mm-3D_glszm_SizeZoneNonUniformity            | 0.991079243 |
| log-sigma-4-5-mm-3D_glszm_SizeZoneNonUniformityNormalized  | 0.940216983 |
| log-sigma-4-5-mm-3D_glszm_SmallAreaEmphasis                | 0.958713734 |
| log-sigma-4-5-mm-3D_glszm_SmallAreaHighGrayLevelEmphasis   | 0.936451255 |
| log-sigma-4-5-mm-3D_glszm_SmallAreaLowGrayLevelEmphasis    | 0.758721169 |
| log-sigma-4-5-mm-3D_glszm_ZoneEntropy                      | 0.948975722 |
| log-sigma-4-5-mm-3D_glszm_ZonePercentage                   | 0.942754234 |
| log-sigma-4-5-mm-3D_glszm_ZoneVariance                     | 0.999978628 |
| log-sigma-4-5-mm-3D_ngtdm_Busyness                         | 0.993661735 |
| log-sigma-4-5-mm-3D_ngtdm_Coarseness                       | 0.99656136  |
| log-sigma-4-5-mm-3D_ngtdm_Complexity                       | 0.913910938 |
| log-sigma-4-5-mm-3D_ngtdm_Contrast                         | 0.975858988 |
| log-sigma-4-5-mm-3D_ngtdm_Strength                         | 0.946155206 |
| original_firstorder_10Percentile                           | 0.944378154 |
| original_firstorder_90Percentile                           | 0.999758619 |
| original_firstorder_Energy                                 | 0.999254242 |

---

---

|                                                 |             |
|-------------------------------------------------|-------------|
| original_firstorder_Entropy                     | 0.895102109 |
| original_firstorder_InterquartileRange          | 0.85770667  |
| original_firstorder_Kurtosis                    | 0.743363882 |
| original_firstorder_Maximum                     | 0.937093413 |
| original_firstorder_Mean                        | 0.986938734 |
| original_firstorder_MeanAbsoluteDeviation       | 0.865479573 |
| original_firstorder_Median                      | 0.997363742 |
| original_firstorder_Minimum                     | 0.705171101 |
| original_firstorder_Range                       | 0.708225827 |
| original_firstorder_RobustMeanAbsoluteDeviation | 0.849664349 |
| original_firstorder_RootMeanSquared             | 0.982561592 |
| original_firstorder_Skewness                    | 0.902597663 |
| original_firstorder_TotalEnergy                 | 0.999254242 |
| original_firstorder_Uniformity                  | 0.880014108 |
| original_firstorder_Variance                    | 0.87632485  |
| original_glcm_ClusterProminence                 | 0.931264681 |
| original_glcm_ClusterShade                      | 0.900542169 |
| original_glcm_ClusterTendency                   | 0.890433194 |
| original_glcm_Contrast                          | 0.911824767 |
| original_glcm_Correlation                       | 0.844303983 |
| original_glcm_DifferenceAverage                 | 0.923263568 |
| original_glcm_DifferenceEntropy                 | 0.908003573 |
| original_glcm_DifferenceVariance                | 0.868846615 |
| original_glcm_Id                                | 0.938014254 |
| original_glcm_Idm                               | 0.93950595  |
| original_glcm_Idmn                              | 0.940857044 |
| original_glcm_Idn                               | 0.959363978 |
| original_glcm_Imc1                              | 0.868480806 |
| original_glcm_Imc2                              | 0.846887312 |

---

---

|                                                    |             |
|----------------------------------------------------|-------------|
| original_glcm_InverseVariance                      | 0.941569583 |
| original_glcm_JointEnergy                          | 0.884065746 |
| original_glcm_JointEntropy                         | 0.912692077 |
| original_glcm_MaximumProbability                   | 0.913799505 |
| original_glcm_SumEntropy                           | 0.890235713 |
| original_glcm_SumSquares                           | 0.895427589 |
| original_gldm_DependenceEntropy                    | 0.872136684 |
| original_gldm_DependenceNonUniformity              | 0.999846993 |
| original_gldm_DependenceNonUniformityNormalized    | 0.96915646  |
| original_gldm_DependenceVariance                   | 0.987862447 |
| original_gldm_GrayLevelNonUniformity               | 0.999957461 |
| original_gldm_GrayLevelVariance                    | 0.876050282 |
| original_gldm_LargeDependenceEmphasis              | 0.961861001 |
| original_gldm_LargeDependenceLowGrayLevelEmphasis  | 0.90934747  |
| original_gldm_LowGrayLevelEmphasis                 | 0.973874274 |
| original_gldm_SmallDependenceEmphasis              | 0.933645639 |
| original_gldm_SmallDependenceHighGrayLevelEmphasis | 0.838158008 |
| original_gldm_SmallDependenceLowGrayLevelEmphasis  | 0.982364374 |
| original_glrlm_GrayLevelNonUniformity              | 0.999949773 |
| original_glrlm_GrayLevelNonUniformityNormalized    | 0.873807205 |
| original_glrlm_GrayLevelVariance                   | 0.876506896 |
| original_glrlm_LongRunEmphasis                     | 0.961865545 |
| original_glrlm_LongRunLowGrayLevelEmphasis         | 0.945987576 |
| original_glrlm_LowGrayLevelRunEmphasis             | 0.974716416 |
| original_glrlm_RunEntropy                          | 0.859428382 |
| original_glrlm_RunLengthNonUniformity              | 0.999673179 |
| original_glrlm_RunLengthNonUniformityNormalized    | 0.952208366 |
| original_glrlm_RunPercentage                       | 0.955456612 |
| original_glrlm_RunVariance                         | 0.969019331 |

---

---

|                                                 |             |
|-------------------------------------------------|-------------|
| original_glrIm_ShortRunEmphasis                 | 0.949936296 |
| original_glrIm_ShortRunLowGrayLevelEmphasis     | 0.978915182 |
| original_glszm_GrayLevelNonUniformity           | 0.999536307 |
| original_glszm_GrayLevelNonUniformityNormalized | 0.808898696 |
| original_glszm_GrayLevelVariance                | 0.915976017 |
| original_glszm_LargeAreaEmphasis                | 0.999822302 |
| original_glszm_LargeAreaHighGrayLevelEmphasis   | 0.97671686  |
| original_glszm_LowGrayLevelZoneEmphasis         | 0.976532847 |
| original_glszm_SizeZoneNonUniformity            | 0.996260328 |
| original_glszm_SizeZoneNonUniformityNormalized  | 0.855212437 |
| original_glszm_SmallAreaEmphasis                | 0.854800032 |
| original_glszm_SmallAreaLowGrayLevelEmphasis    | 0.974544664 |
| original_glszm_ZoneEntropy                      | 0.847502019 |
| original_glszm_ZonePercentage                   | 0.938649876 |
| original_glszm_ZoneVariance                     | 0.999824044 |
| original_ngtdm_Busyness                         | 0.846347497 |
| original_ngtdm_Coarseness                       | 0.991647966 |
| original_ngtdm_Complexity                       | 0.965936982 |
| original_ngtdm_Contrast                         | 0.980521678 |
| original_ngtdm_Strength                         | 0.947659423 |
| original_shape_Compactness1                     | 0.948697053 |
| original_shape_Compactness2                     | 0.949097959 |
| original_shape_Elongation                       | 0.86668143  |
| original_shape_Flatness                         | 0.942841074 |
| original_shape_LeastAxis                        | 0.997188088 |
| original_shape_MajorAxis                        | 0.997795468 |
| original_shape_Maximum2DDiameterColumn          | 0.996011163 |
| original_shape_Maximum2DDiameterRow             | 0.996896383 |
| original_shape_Maximum2DDiameterSlice           | 0.991230104 |

---



---

|                                               |             |
|-----------------------------------------------|-------------|
| original_shape_Maximum3DDiameter              | 0.997773035 |
| original_shape_MinorAxis                      | 0.99775835  |
| original_shape_SphericalDisproportion         | 0.957988473 |
| original_shape_Sphericity                     | 0.949597455 |
| original_shape_SurfaceArea                    | 0.998100148 |
| original_shape_SurfaceVolumeRatio             | 0.975462648 |
| original_shape_Volume                         | 0.999864852 |
| square_firstorder_10Percentile                | 0.999895956 |
| square_firstorder_90Percentile                | 0.984186303 |
| square_firstorder_Energy                      | 0.999795226 |
| square_firstorder_Entropy                     | 0.967196662 |
| square_firstorder_InterquartileRange          | 0.997089483 |
| square_firstorder_Maximum                     | 0.769179781 |
| square_firstorder_Mean                        | 0.996570564 |
| square_firstorder_MeanAbsoluteDeviation       | 0.974331945 |
| square_firstorder_Median                      | 0.999488259 |
| square_firstorder_Minimum                     | 0.999999937 |
| square_firstorder_Range                       | 0.768947923 |
| square_firstorder_RobustMeanAbsoluteDeviation | 0.990829004 |
| square_firstorder_RootMeanSquared             | 0.987712147 |
| square_firstorder_TotalEnergy                 | 0.999795226 |
| square_firstorder_Uniformity                  | 0.956623139 |
| square_firstorder_Variance                    | 0.992689736 |
| square_glcm_Autocorrelation                   | 0.999845307 |
| square_glcm_ClusterProminence                 | 0.998591992 |
| square_glcm_ClusterShade                      | 0.978280651 |
| square_glcm_ClusterTendency                   | 0.997286797 |
| square_glcm_Contrast                          | 0.995338228 |
| square_glcm_Correlation                       | 0.946246359 |

---

---

|                                                  |             |
|--------------------------------------------------|-------------|
| square_glcm_DifferenceAverage                    | 0.989056674 |
| square_glcm_DifferenceEntropy                    | 0.957427755 |
| square_glcm_DifferenceVariance                   | 0.982422961 |
| square_glcm_Id                                   | 0.981835423 |
| square_glcm_Idm                                  | 0.981802977 |
| square_glcm_Idmn                                 | 0.966456636 |
| square_glcm_Idn                                  | 0.974394163 |
| square_glcm_Imc1                                 | 0.740966467 |
| square_glcm_Imc2                                 | 0.914317792 |
| square_glcm_InverseVariance                      | 0.971960395 |
| square_glcm_JointAverage                         | 0.998401201 |
| square_glcm_JointEnergy                          | 0.95617767  |
| square_glcm_JointEntropy                         | 0.979888892 |
| square_glcm_MaximumProbability                   | 0.981565591 |
| square_glcm_SumAverage                           | 0.998401201 |
| square_glcm_SumEntropy                           | 0.969961656 |
| square_glcm_SumSquares                           | 0.996731098 |
| square_gldm_DependenceEntropy                    | 0.973653648 |
| square_gldm_DependenceNonUniformity              | 0.999755561 |
| square_gldm_DependenceNonUniformityNormalized    | 0.987208456 |
| square_gldm_DependenceVariance                   | 0.898982714 |
| square_gldm_GrayLevelNonUniformity               | 0.999861605 |
| square_gldm_GrayLevelVariance                    | 0.993606273 |
| square_gldm_HighGrayLevelEmphasis                | 0.999283207 |
| square_gldm_LargeDependenceEmphasis              | 0.979312845 |
| square_gldm_LargeDependenceHighGrayLevelEmphasis | 0.983101378 |
| square_gldm_LargeDependenceLowGrayLevelEmphasis  | 0.979669532 |
| square_gldm_LowGrayLevelEmphasis                 | 0.984087906 |
| square_gldm_SmallDependenceEmphasis              | 0.966323394 |

---

---

|                                                  |             |
|--------------------------------------------------|-------------|
| square_gldm_SmallDependenceHighGrayLevelEmphasis | 0.998573563 |
| square_gldm_SmallDependenceLowGrayLevelEmphasis  | 0.872322679 |
| square_glrlm_GrayLevelNonUniformity              | 0.998243974 |
| square_glrlm_GrayLevelNonUniformityNormalized    | 0.8987038   |
| square_glrlm_GrayLevelVariance                   | 0.983204998 |
| square_glrlm_HighGrayLevelRunEmphasis            | 0.996375932 |
| square_glrlm_LongRunEmphasis                     | 0.998736137 |
| square_glrlm_LongRunHighGrayLevelEmphasis        | 0.999358491 |
| square_glrlm_LongRunLowGrayLevelEmphasis         | 0.99871164  |
| square_glrlm_LowGrayLevelRunEmphasis             | 0.938345948 |
| square_glrlm_RunEntropy                          | 0.946972012 |
| square_glrlm_RunLengthNonUniformity              | 0.996342184 |
| square_glrlm_RunLengthNonUniformityNormalized    | 0.958445383 |
| square_glrlm_RunPercentage                       | 0.978451352 |
| square_glrlm_RunVariance                         | 0.998788657 |
| square_glrlm_ShortRunEmphasis                    | 0.918298407 |
| square_glrlm_ShortRunHighGrayLevelEmphasis       | 0.996093032 |
| square_glrlm_ShortRunLowGrayLevelEmphasis        | 0.965153495 |
| square_glszm_GrayLevelNonUniformity              | 0.909593687 |
| square_glszm_GrayLevelNonUniformityNormalized    | 0.924990061 |
| square_glszm_GrayLevelVariance                   | 0.95451136  |
| square_glszm_HighGrayLevelZoneEmphasis           | 0.989758025 |
| square_glszm_LargeAreaEmphasis                   | 0.999814915 |
| square_glszm_LargeAreaHighGrayLevelEmphasis      | 0.999814917 |
| square_glszm_LargeAreaLowGrayLevelEmphasis       | 0.999814915 |
| square_glszm_LowGrayLevelZoneEmphasis            | 0.914350204 |
| square_glszm_SizeZoneNonUniformity               | 0.985156995 |
| square_glszm_SizeZoneNonUniformityNormalized     | 0.827732273 |
| square_glszm_SmallAreaEmphasis                   | 0.946849424 |

---

---

|                                                   |             |
|---------------------------------------------------|-------------|
| square_glszm_SmallAreaHighGrayLevelEmphasis       | 0.987591579 |
| square_glszm_SmallAreaLowGrayLevelEmphasis        | 0.793266761 |
| square_glszm_ZoneEntropy                          | 0.884950347 |
| square_glszm_ZonePercentage                       | 0.965410085 |
| square_glszm_ZoneVariance                         | 0.999832599 |
| square_ngtdm_Coarseness                           | 1           |
| square_ngtdm_Complexity                           | 0.996026094 |
| squareroot_firstorder_10Percentile                | 0.916216953 |
| squareroot_firstorder_90Percentile                | 0.999004066 |
| squareroot_firstorder_Energy                      | 0.999727923 |
| squareroot_firstorder_Entropy                     | 0.787032396 |
| squareroot_firstorder_InterquartileRange          | 0.759210129 |
| squareroot_firstorder_Kurtosis                    | 0.924713166 |
| squareroot_firstorder_Maximum                     | 0.975931397 |
| squareroot_firstorder_Mean                        | 0.979537108 |
| squareroot_firstorder_MeanAbsoluteDeviation       | 0.794475705 |
| squareroot_firstorder_Median                      | 0.997038497 |
| squareroot_firstorder_Minimum                     | 0.747535648 |
| squareroot_firstorder_Range                       | 0.899595575 |
| squareroot_firstorder_RobustMeanAbsoluteDeviation | 0.759641361 |
| squareroot_firstorder_RootMeanSquared             | 0.982678105 |
| squareroot_firstorder_Skewness                    | 0.934665241 |
| squareroot_firstorder_TotalEnergy                 | 0.999727923 |
| squareroot_firstorder_Uniformity                  | 0.764808598 |
| squareroot_firstorder_Variance                    | 0.803153827 |
| squareroot_glcm_Autocorrelation                   | 0.849349855 |
| squareroot_glcm_ClusterProminence                 | 0.87995196  |
| squareroot_glcm_ClusterShade                      | 0.914975726 |
| squareroot_glcm_ClusterTendency                   | 0.786779372 |

---

---

|                                                      |             |
|------------------------------------------------------|-------------|
| squareroot_glcm_Contrast                             | 0.80230435  |
| squareroot_glcm_Correlation                          | 0.805821995 |
| squareroot_glcm_DifferenceAverage                    | 0.815433213 |
| squareroot_glcm_DifferenceEntropy                    | 0.817297031 |
| squareroot_glcm_DifferenceVariance                   | 0.813058403 |
| squareroot_glcm_Id                                   | 0.840511034 |
| squareroot_glcm_Idm                                  | 0.847632165 |
| squareroot_glcm_Idmn                                 | 0.903939346 |
| squareroot_glcm_Idn                                  | 0.909956069 |
| squareroot_glcm_Imc1                                 | 0.94838469  |
| squareroot_glcm_Imc2                                 | 0.900516317 |
| squareroot_glcm_InverseVariance                      | 0.853622979 |
| squareroot_glcm_JointAverage                         | 0.906930744 |
| squareroot_glcm_JointEnergy                          | 0.766713545 |
| squareroot_glcm_JointEntropy                         | 0.786173605 |
| squareroot_glcm_MaximumProbability                   | 0.872072846 |
| squareroot_glcm_SumAverage                           | 0.906930744 |
| squareroot_glcm_SumEntropy                           | 0.770506468 |
| squareroot_glcm_SumSquares                           | 0.786922372 |
| squareroot_gldm_DependenceEntropy                    | 0.850572175 |
| squareroot_gldm_DependenceNonUniformity              | 0.999737556 |
| squareroot_gldm_DependenceNonUniformityNormalized    | 0.881274927 |
| squareroot_gldm_DependenceVariance                   | 0.936920809 |
| squareroot_gldm_GrayLevelNonUniformity               | 0.999899424 |
| squareroot_gldm_GrayLevelVariance                    | 0.803401485 |
| squareroot_gldm_HighGrayLevelEmphasis                | 0.853095225 |
| squareroot_gldm_LargeDependenceEmphasis              | 0.905662545 |
| squareroot_gldm_LargeDependenceHighGrayLevelEmphasis | 0.860187764 |
| squareroot_gldm_LargeDependenceLowGrayLevelEmphasis  | 0.99116236  |

---

---

|                                                      |             |
|------------------------------------------------------|-------------|
| squareroot_gldm_LowGrayLevelEmphasis                 | 0.993324162 |
| squareroot_gldm_SmallDependenceEmphasis              | 0.862412519 |
| squareroot_gldm_SmallDependenceHighGrayLevelEmphasis | 0.900431776 |
| squareroot_gldm_SmallDependenceLowGrayLevelEmphasis  | 0.983772537 |
| squareroot_glrIm_GrayLevelNonUniformity              | 0.999915796 |
| squareroot_glrIm_GrayLevelNonUniformityNormalized    | 0.76509375  |
| squareroot_glrIm_GrayLevelVariance                   | 0.812032124 |
| squareroot_glrIm_HighGrayLevelRunEmphasis            | 0.854032511 |
| squareroot_glrIm_LongRunEmphasis                     | 0.904322811 |
| squareroot_glrIm_LongRunHighGrayLevelEmphasis        | 0.843955372 |
| squareroot_glrIm_LongRunLowGrayLevelEmphasis         | 0.994405466 |
| squareroot_glrIm_LowGrayLevelRunEmphasis             | 0.992878905 |
| squareroot_glrIm_RunEntropy                          | 0.778810813 |
| squareroot_glrIm_RunLengthNonUniformity              | 0.999799768 |
| squareroot_glrIm_RunLengthNonUniformityNormalized    | 0.882330068 |
| squareroot_glrIm_RunPercentage                       | 0.89233286  |
| squareroot_glrIm_RunVariance                         | 0.917227513 |
| squareroot_glrIm_ShortRunEmphasis                    | 0.883890064 |
| squareroot_glrIm_ShortRunHighGrayLevelEmphasis       | 0.857880685 |
| squareroot_glrIm_ShortRunLowGrayLevelEmphasis        | 0.992469579 |
| squareroot_glszm_GrayLevelNonUniformity              | 0.999853758 |
| squareroot_glszm_GrayLevelNonUniformityNormalized    | 0.807321157 |
| squareroot_glszm_GrayLevelVariance                   | 0.905216279 |
| squareroot_glszm_HighGrayLevelZoneEmphasis           | 0.855848794 |
| squareroot_glszm_LargeAreaEmphasis                   | 0.999232737 |
| squareroot_glszm_LargeAreaHighGrayLevelEmphasis      | 0.960223398 |
| squareroot_glszm_LargeAreaLowGrayLevelEmphasis       | 0.879818408 |
| squareroot_glszm_LowGrayLevelZoneEmphasis            | 0.986966828 |
| squareroot_glszm_SizeZoneNonUniformity               | 0.998958457 |

---

---

|                                                    |             |
|----------------------------------------------------|-------------|
| squareroot_glszm_SizeZoneNonUniformityNormalized   | 0.946881531 |
| squareroot_glszm_SmallAreaEmphasis                 | 0.951066404 |
| squareroot_glszm_SmallAreaHighGrayLevelEmphasis    | 0.847822009 |
| squareroot_glszm_SmallAreaLowGrayLevelEmphasis     | 0.978113831 |
| squareroot_glszm_ZoneEntropy                       | 0.876435515 |
| squareroot_glszm_ZonePercentage                    | 0.879594594 |
| squareroot_glszm_ZoneVariance                      | 0.999238641 |
| squareroot_ngtdm_Busyness                          | 0.972425636 |
| squareroot_ngtdm_Coarseness                        | 0.986755015 |
| squareroot_ngtdm_Complexity                        | 0.95468051  |
| squareroot_ngtdm_Contrast                          | 0.988117149 |
| squareroot_ngtdm_Strength                          | 0.952560953 |
| wavelet-HHH_firstorder_10Percentile                | 0.985419797 |
| wavelet-HHH_firstorder_90Percentile                | 0.983053879 |
| wavelet-HHH_firstorder_Energy                      | 0.848452288 |
| wavelet-HHH_firstorder_Entropy                     | 0.909905376 |
| wavelet-HHH_firstorder_InterquartileRange          | 0.978290892 |
| wavelet-HHH_firstorder_Kurtosis                    | 0.935699591 |
| wavelet-HHH_firstorder_Maximum                     | 0.884253443 |
| wavelet-HHH_firstorder_Mean                        | 0.846829535 |
| wavelet-HHH_firstorder_MeanAbsoluteDeviation       | 0.960465438 |
| wavelet-HHH_firstorder_Median                      | 0.966051422 |
| wavelet-HHH_firstorder_Minimum                     | 0.874063581 |
| wavelet-HHH_firstorder_Range                       | 0.885933639 |
| wavelet-HHH_firstorder_RobustMeanAbsoluteDeviation | 0.982400656 |
| wavelet-HHH_firstorder_RootMeanSquared             | 0.933516432 |
| wavelet-HHH_firstorder_Skewness                    | 0.764799079 |
| wavelet-HHH_firstorder_TotalEnergy                 | 0.848452288 |
| wavelet-HHH_firstorder_Uniformity                  | 0.893088338 |

---

---

|                                                    |             |
|----------------------------------------------------|-------------|
| wavelet-HHH_firstorder_Variance                    | 0.977311586 |
| wavelet-HHH_glcm_Autocorrelation                   | 0.853251747 |
| wavelet-HHH_glcm_ClusterProminence                 | 0.990570352 |
| wavelet-HHH_glcm_ClusterShade                      | 0.996595255 |
| wavelet-HHH_glcm_ClusterTendency                   | 0.980676221 |
| wavelet-HHH_glcm_Contrast                          | 0.983488791 |
| wavelet-HHH_glcm_Correlation                       | 0.720413414 |
| wavelet-HHH_glcm_DifferenceAverage                 | 0.965526842 |
| wavelet-HHH_glcm_DifferenceEntropy                 | 0.915138553 |
| wavelet-HHH_glcm_DifferenceVariance                | 0.971523595 |
| wavelet-HHH_glcm_Id                                | 0.922058474 |
| wavelet-HHH_glcm_Idm                               | 0.918857235 |
| wavelet-HHH_glcm_Idmn                              | 0.984269982 |
| wavelet-HHH_glcm_Idn                               | 0.988937669 |
| wavelet-HHH_glcm_Imc1                              | 0.95357625  |
| wavelet-HHH_glcm_Imc2                              | 0.88513595  |
| wavelet-HHH_glcm_InverseVariance                   | 0.933995504 |
| wavelet-HHH_glcm_JointAverage                      | 0.872477002 |
| wavelet-HHH_glcm_JointEnergy                       | 0.891100299 |
| wavelet-HHH_glcm_JointEntropy                      | 0.906362216 |
| wavelet-HHH_glcm_MaximumProbability                | 0.906703489 |
| wavelet-HHH_glcm_SumAverage                        | 0.872477002 |
| wavelet-HHH_glcm_SumEntropy                        | 0.908047123 |
| wavelet-HHH_glcm_SumSquares                        | 0.982362042 |
| wavelet-HHH_gldm_DependenceEntropy                 | 0.883860538 |
| wavelet-HHH_gldm_DependenceNonUniformity           | 0.998939043 |
| wavelet-HHH_gldm_DependenceNonUniformityNormalized | 0.975627268 |
| wavelet-HHH_gldm_DependenceVariance                | 0.972285942 |
| wavelet-HHH_gldm_GrayLevelNonUniformity            | 0.942845412 |

---



---

|                                                       |             |
|-------------------------------------------------------|-------------|
| wavelet-HHH_gldm_GrayLevelVariance                    | 0.977351996 |
| wavelet-HHH_gldm_HighGrayLevelEmphasis                | 0.859627603 |
| wavelet-HHH_gldm_LargeDependenceEmphasis              | 0.911799702 |
| wavelet-HHH_gldm_LargeDependenceHighGrayLevelEmphasis | 0.93514433  |
| wavelet-HHH_gldm_LargeDependenceLowGrayLevelEmphasis  | 0.946630229 |
| wavelet-HHH_gldm_LowGrayLevelEmphasis                 | 0.940428114 |
| wavelet-HHH_gldm_SmallDependenceEmphasis              | 0.951130841 |
| wavelet-HHH_gldm_SmallDependenceHighGrayLevelEmphasis | 0.903940951 |
| wavelet-HHH_gldm_SmallDependenceLowGrayLevelEmphasis  | 0.969772577 |
| wavelet-HHH_glrIm_GrayLevelNonUniformity              | 0.967750969 |
| wavelet-HHH_glrIm_GrayLevelNonUniformityNormalized    | 0.888175411 |
| wavelet-HHH_glrIm_GrayLevelVariance                   | 0.975034643 |
| wavelet-HHH_glrIm_HighGrayLevelRunEmphasis            | 0.859307432 |
| wavelet-HHH_glrIm_LongRunEmphasis                     | 0.903738768 |
| wavelet-HHH_glrIm_LongRunHighGrayLevelEmphasis        | 0.888463098 |
| wavelet-HHH_glrIm_LongRunLowGrayLevelEmphasis         | 0.945881534 |
| wavelet-HHH_glrIm_LowGrayLevelRunEmphasis             | 0.941881943 |
| wavelet-HHH_glrIm_RunEntropy                          | 0.911549654 |
| wavelet-HHH_glrIm_RunLengthNonUniformity              | 0.986784546 |
| wavelet-HHH_glrIm_RunLengthNonUniformityNormalized    | 0.918262372 |
| wavelet-HHH_glrIm_RunPercentage                       | 0.917182029 |
| wavelet-HHH_glrIm_RunVariance                         | 0.906958095 |
| wavelet-HHH_glrIm_ShortRunEmphasis                    | 0.90926132  |
| wavelet-HHH_glrIm_ShortRunHighGrayLevelEmphasis       | 0.856775884 |
| wavelet-HHH_glrIm_ShortRunLowGrayLevelEmphasis        | 0.942440114 |
| wavelet-HHH_glszm_GrayLevelNonUniformity              | 0.991824591 |
| wavelet-HHH_glszm_GrayLevelNonUniformityNormalized    | 0.790688156 |
| wavelet-HHH_glszm_GrayLevelVariance                   | 0.950418524 |
| wavelet-HHH_glszm_HighGrayLevelZoneEmphasis           | 0.852783357 |

---

---

|                                                   |             |
|---------------------------------------------------|-------------|
| wavelet-HHH_glszm_LargeAreaEmphasis               | 0.85739167  |
| wavelet-HHH_glszm_LargeAreaHighGrayLevelEmphasis  | 0.995145411 |
| wavelet-HHH_glszm_LargeAreaLowGrayLevelEmphasis   | 0.973435046 |
| wavelet-HHH_glszm_LowGrayLevelZoneEmphasis        | 0.958952939 |
| wavelet-HHH_glszm_SizeZoneNonUniformity           | 0.962187288 |
| wavelet-HHH_glszm_SizeZoneNonUniformityNormalized | 0.831220019 |
| wavelet-HHH_glszm_SmallAreaEmphasis               | 0.84881965  |
| wavelet-HHH_glszm_SmallAreaHighGrayLevelEmphasis  | 0.853684977 |
| wavelet-HHH_glszm_SmallAreaLowGrayLevelEmphasis   | 0.959283379 |
| wavelet-HHH_glszm_ZoneEntropy                     | 0.854023034 |
| wavelet-HHH_glszm_ZonePercentage                  | 0.954682267 |
| wavelet-HHH_glszm_ZoneVariance                    | 0.85686656  |
| wavelet-HHH_ngtdm_Busyness                        | 0.799114339 |
| wavelet-HHH_ngtdm_Coarseness                      | 0.990217439 |
| wavelet-HHH_ngtdm_Complexity                      | 0.997820862 |
| wavelet-HHH_ngtdm_Contrast                        | 0.999843272 |
| wavelet-HHH_ngtdm_Strength                        | 0.947766662 |
| wavelet-HHL_firstorder_10Percentile               | 0.929105794 |
| wavelet-HHL_firstorder_90Percentile               | 0.930927031 |
| wavelet-HHL_firstorder_Energy                     | 0.753493343 |
| wavelet-HHL_firstorder_Entropy                    | 0.882935263 |
| wavelet-HHL_firstorder_InterquartileRange         | 0.970841766 |
| wavelet-HHL_firstorder_Kurtosis                   | 0.887406322 |
| wavelet-HHL_firstorder_Maximum                    | 0.881728773 |
| wavelet-HHL_firstorder_Mean                       | 0.91999859  |
| wavelet-HHL_firstorder_MeanAbsoluteDeviation      | 0.931383305 |
| wavelet-HHL_firstorder_Median                     | 0.861436316 |
| wavelet-HHL_firstorder_Minimum                    | 0.79930021  |
| wavelet-HHL_firstorder_Range                      | 0.843842006 |

---

---

|                                                    |             |
|----------------------------------------------------|-------------|
| wavelet-HHL_firstorder_RobustMeanAbsoluteDeviation | 0.960676038 |
| wavelet-HHL_firstorder_RootMeanSquared             | 0.902209439 |
| wavelet-HHL_firstorder_Skewness                    | 0.789362645 |
| wavelet-HHL_firstorder_TotalEnergy                 | 0.753493343 |
| wavelet-HHL_firstorder_Uniformity                  | 0.868186345 |
| wavelet-HHL_firstorder_Variance                    | 0.948597765 |
| wavelet-HHL_glcm_Autocorrelation                   | 0.724395554 |
| wavelet-HHL_glcm_ClusterProminence                 | 0.970227499 |
| wavelet-HHL_glcm_ClusterShade                      | 0.928688826 |
| wavelet-HHL_glcm_ClusterTendency                   | 0.955818001 |
| wavelet-HHL_glcm_Contrast                          | 0.954696116 |
| wavelet-HHL_glcm_Correlation                       | 0.946179497 |
| wavelet-HHL_glcm_DifferenceAverage                 | 0.938461239 |
| wavelet-HHL_glcm_DifferenceEntropy                 | 0.89192663  |
| wavelet-HHL_glcm_DifferenceVariance                | 0.937990167 |
| wavelet-HHL_glcm_Id                                | 0.915175459 |
| wavelet-HHL_glcm_Idm                               | 0.913165177 |
| wavelet-HHL_glcm_Idmn                              | 0.984769331 |
| wavelet-HHL_glcm_Idn                               | 0.981045664 |
| wavelet-HHL_glcm_Imc1                              | 0.919759598 |
| wavelet-HHL_glcm_Imc2                              | 0.837371698 |
| wavelet-HHL_glcm_InverseVariance                   | 0.92367117  |
| wavelet-HHL_glcm_JointAverage                      | 0.796859777 |
| wavelet-HHL_glcm_JointEnergy                       | 0.865091938 |
| wavelet-HHL_glcm_JointEntropy                      | 0.886409915 |
| wavelet-HHL_glcm_MaximumProbability                | 0.897863409 |
| wavelet-HHL_glcm_SumAverage                        | 0.796859777 |
| wavelet-HHL_glcm_SumEntropy                        | 0.885223922 |
| wavelet-HHL_glcm_SumSquares                        | 0.955391471 |

---

---

|                                                       |             |
|-------------------------------------------------------|-------------|
| wavelet-HHL_gldm_DependenceEntropy                    | 0.849860305 |
| wavelet-HHL_gldm_DependenceNonUniformity              | 0.993855828 |
| wavelet-HHL_gldm_DependenceNonUniformityNormalized    | 0.972028135 |
| wavelet-HHL_gldm_DependenceVariance                   | 0.968203268 |
| wavelet-HHL_gldm_GrayLevelNonUniformity               | 0.919204301 |
| wavelet-HHL_gldm_GrayLevelVariance                    | 0.948536132 |
| wavelet-HHL_gldm_HighGrayLevelEmphasis                | 0.730093669 |
| wavelet-HHL_gldm_LargeDependenceEmphasis              | 0.899904592 |
| wavelet-HHL_gldm_LargeDependenceHighGrayLevelEmphasis | 0.836314691 |
| wavelet-HHL_gldm_LargeDependenceLowGrayLevelEmphasis  | 0.922799737 |
| wavelet-HHL_gldm_LowGrayLevelEmphasis                 | 0.963556655 |
| wavelet-HHL_gldm_SmallDependenceEmphasis              | 0.943018325 |
| wavelet-HHL_gldm_SmallDependenceHighGrayLevelEmphasis | 0.862470324 |
| wavelet-HHL_gldm_SmallDependenceLowGrayLevelEmphasis  | 0.969669174 |
| wavelet-HHL_glrlm_GrayLevelNonUniformity              | 0.955437863 |
| wavelet-HHL_glrlm_GrayLevelNonUniformityNormalized    | 0.860494526 |
| wavelet-HHL_glrlm_GrayLevelVariance                   | 0.94552035  |
| wavelet-HHL_glrlm_HighGrayLevelRunEmphasis            | 0.730485322 |
| wavelet-HHL_glrlm_LongRunEmphasis                     | 0.892959006 |
| wavelet-HHL_glrlm_LongRunHighGrayLevelEmphasis        | 0.745999318 |
| wavelet-HHL_glrlm_LongRunLowGrayLevelEmphasis         | 0.933772095 |
| wavelet-HHL_glrlm_LowGrayLevelRunEmphasis             | 0.965339176 |
| wavelet-HHL_glrlm_RunEntropy                          | 0.87190124  |
| wavelet-HHL_glrlm_RunLengthNonUniformity              | 0.988294705 |
| wavelet-HHL_glrlm_RunLengthNonUniformityNormalized    | 0.914424456 |
| wavelet-HHL_glrlm_RunPercentage                       | 0.910288745 |
| wavelet-HHL_glrlm_RunVariance                         | 0.895187666 |
| wavelet-HHL_glrlm_ShortRunEmphasis                    | 0.902713337 |
| wavelet-HHL_glrlm_ShortRunHighGrayLevelEmphasis       | 0.735609559 |

---

---

|                                                    |             |
|----------------------------------------------------|-------------|
| wavelet-HHL_gIrlm_ShortRunLowGrayLevelEmphasis     | 0.971194592 |
| wavelet-HHL_glszm_GrayLevelNonUniformity           | 0.989600678 |
| wavelet-HHL_glszm_GrayLevelNonUniformityNormalized | 0.780311818 |
| wavelet-HHL_glszm_GrayLevelVariance                | 0.903513829 |
| wavelet-HHL_glszm_HighGrayLevelZoneEmphasis        | 0.736061443 |
| wavelet-HHL_glszm_LargeAreaEmphasis                | 0.733700172 |
| wavelet-HHL_glszm_LargeAreaHighGrayLevelEmphasis   | 0.987405985 |
| wavelet-HHL_glszm_LargeAreaLowGrayLevelEmphasis    | 0.815686704 |
| wavelet-HHL_glszm_LowGrayLevelZoneEmphasis         | 0.982527483 |
| wavelet-HHL_glszm_SizeZoneNonUniformity            | 0.915114823 |
| wavelet-HHL_glszm_SizeZoneNonUniformityNormalized  | 0.941838957 |
| wavelet-HHL_glszm_SmallAreaEmphasis                | 0.941159966 |
| wavelet-HHL_glszm_SmallAreaHighGrayLevelEmphasis   | 0.755969037 |
| wavelet-HHL_glszm_SmallAreaLowGrayLevelEmphasis    | 0.98176168  |
| wavelet-HHL_glszm_ZoneEntropy                      | 0.839612516 |
| wavelet-HHL_glszm_ZonePercentage                   | 0.943181297 |
| wavelet-HHL_glszm_ZoneVariance                     | 0.733611271 |
| wavelet-HHL_ngtdm_Busyness                         | 0.752087943 |
| wavelet-HHL_ngtdm_Coarseness                       | 0.98789084  |
| wavelet-HHL_ngtdm_Complexity                       | 0.975414797 |
| wavelet-HHL_ngtdm_Contrast                         | 0.996824795 |
| wavelet-HHL_ngtdm_Strength                         | 0.903764714 |
| wavelet-HLH_firstorder_10Percentile                | 0.949828832 |
| wavelet-HLH_firstorder_90Percentile                | 0.945935442 |
| wavelet-HLH_firstorder_Energy                      | 0.881255459 |
| wavelet-HLH_firstorder_Entropy                     | 0.90716477  |
| wavelet-HLH_firstorder_InterquartileRange          | 0.970892325 |
| wavelet-HLH_firstorder_Kurtosis                    | 0.887190709 |
| wavelet-HLH_firstorder_Maximum                     | 0.821096874 |

---

---

|                                                    |             |
|----------------------------------------------------|-------------|
| wavelet-HLH_firstorder_Mean                        | 0.91397273  |
| wavelet-HLH_firstorder_MeanAbsoluteDeviation       | 0.940333091 |
| wavelet-HLH_firstorder_Median                      | 0.917856824 |
| wavelet-HLH_firstorder_Minimum                     | 0.837230571 |
| wavelet-HLH_firstorder_Range                       | 0.83116438  |
| wavelet-HLH_firstorder_RobustMeanAbsoluteDeviation | 0.96675584  |
| wavelet-HLH_firstorder_RootMeanSquared             | 0.911578897 |
| wavelet-HLH_firstorder_Skewness                    | 0.874304946 |
| wavelet-HLH_firstorder_TotalEnergy                 | 0.881255459 |
| wavelet-HLH_firstorder_Uniformity                  | 0.91642082  |
| wavelet-HLH_firstorder_Variance                    | 0.954331865 |
| wavelet-HLH_glcm_Autocorrelation                   | 0.803779814 |
| wavelet-HLH_glcm_ClusterProminence                 | 0.981522009 |
| wavelet-HLH_glcm_ClusterShade                      | 0.978881485 |
| wavelet-HLH_glcm_ClusterTendency                   | 0.954419713 |
| wavelet-HLH_glcm_Contrast                          | 0.967551053 |
| wavelet-HLH_glcm_Correlation                       | 0.896184834 |
| wavelet-HLH_glcm_DifferenceAverage                 | 0.950061204 |
| wavelet-HLH_glcm_DifferenceEntropy                 | 0.917404439 |
| wavelet-HLH_glcm_DifferenceVariance                | 0.956318381 |
| wavelet-HLH_glcm_Id                                | 0.946229656 |
| wavelet-HLH_glcm_Idm                               | 0.946206829 |
| wavelet-HLH_glcm_Idmn                              | 0.956959367 |
| wavelet-HLH_glcm_Idn                               | 0.963603368 |
| wavelet-HLH_glcm_Imc1                              | 0.949398133 |
| wavelet-HLH_glcm_Imc2                              | 0.837195827 |
| wavelet-HLH_glcm_InverseVariance                   | 0.936517166 |
| wavelet-HLH_glcm_JointAverage                      | 0.830076221 |
| wavelet-HLH_glcm_JointEnergy                       | 0.932361574 |

---

---

|                                                       |             |
|-------------------------------------------------------|-------------|
| wavelet-HLH_glcm_JointEntropy                         | 0.914832191 |
| wavelet-HLH_glcm_MaximumProbability                   | 0.948841741 |
| wavelet-HLH_glcm_SumAverage                           | 0.830076221 |
| wavelet-HLH_glcm_SumEntropy                           | 0.904959286 |
| wavelet-HLH_glcm_SumSquares                           | 0.959965985 |
| wavelet-HLH_gldm_DependenceEntropy                    | 0.873588137 |
| wavelet-HLH_gldm_DependenceNonUniformity              | 0.99899575  |
| wavelet-HLH_gldm_DependenceNonUniformityNormalized    | 0.979934739 |
| wavelet-HLH_gldm_DependenceVariance                   | 0.982947705 |
| wavelet-HLH_gldm_GrayLevelNonUniformity               | 0.966546699 |
| wavelet-HLH_gldm_GrayLevelVariance                    | 0.953819083 |
| wavelet-HLH_gldm_HighGrayLevelEmphasis                | 0.814076383 |
| wavelet-HLH_gldm_LargeDependenceEmphasis              | 0.956383158 |
| wavelet-HLH_gldm_LargeDependenceHighGrayLevelEmphasis | 0.949164025 |
| wavelet-HLH_gldm_LargeDependenceLowGrayLevelEmphasis  | 0.93771721  |
| wavelet-HLH_gldm_LowGrayLevelEmphasis                 | 0.924654505 |
| wavelet-HLH_gldm_SmallDependenceEmphasis              | 0.961928479 |
| wavelet-HLH_gldm_SmallDependenceHighGrayLevelEmphasis | 0.91834436  |
| wavelet-HLH_gldm_SmallDependenceLowGrayLevelEmphasis  | 0.940380382 |
| wavelet-HLH_glrlm_GrayLevelNonUniformity              | 0.978852512 |
| wavelet-HLH_glrlm_GrayLevelNonUniformityNormalized    | 0.906886864 |
| wavelet-HLH_glrlm_GrayLevelVariance                   | 0.945227979 |
| wavelet-HLH_glrlm_HighGrayLevelRunEmphasis            | 0.814991298 |
| wavelet-HLH_glrlm_LongRunEmphasis                     | 0.954794209 |
| wavelet-HLH_glrlm_LongRunHighGrayLevelEmphasis        | 0.870430834 |
| wavelet-HLH_glrlm_LongRunLowGrayLevelEmphasis         | 0.925699095 |
| wavelet-HLH_glrlm_LowGrayLevelRunEmphasis             | 0.925370975 |
| wavelet-HLH_glrlm_RunEntropy                          | 0.863185272 |
| wavelet-HLH_glrlm_RunLengthNonUniformity              | 0.992199297 |

---

---

|                                                    |             |
|----------------------------------------------------|-------------|
| wavelet-HLH_glrIm_RunLengthNonUniformityNormalized | 0.953522873 |
| wavelet-HLH_glrIm_RunPercentage                    | 0.955464514 |
| wavelet-HLH_glrIm_RunVariance                      | 0.957843111 |
| wavelet-HLH_glrIm_ShortRunEmphasis                 | 0.949962122 |
| wavelet-HLH_glrIm_ShortRunHighGrayLevelEmphasis    | 0.818205975 |
| wavelet-HLH_glrIm_ShortRunLowGrayLevelEmphasis     | 0.931275461 |
| wavelet-HLH_glszm_GrayLevelNonUniformity           | 0.97131146  |
| wavelet-HLH_glszm_GrayLevelNonUniformityNormalized | 0.707731986 |
| wavelet-HLH_glszm_GrayLevelVariance                | 0.860085183 |
| wavelet-HLH_glszm_HighGrayLevelZoneEmphasis        | 0.827536207 |
| wavelet-HLH_glszm_LargeAreaEmphasis                | 0.910460956 |
| wavelet-HLH_glszm_LargeAreaHighGrayLevelEmphasis   | 0.970556467 |
| wavelet-HLH_glszm_LargeAreaLowGrayLevelEmphasis    | 0.915930434 |
| wavelet-HLH_glszm_LowGrayLevelZoneEmphasis         | 0.933821132 |
| wavelet-HLH_glszm_SizeZoneNonUniformity            | 0.957452156 |
| wavelet-HLH_glszm_SizeZoneNonUniformityNormalized  | 0.899440073 |
| wavelet-HLH_glszm_SmallAreaEmphasis                | 0.911506338 |
| wavelet-HLH_glszm_SmallAreaHighGrayLevelEmphasis   | 0.844135873 |
| wavelet-HLH_glszm_SmallAreaLowGrayLevelEmphasis    | 0.923692911 |
| wavelet-HLH_glszm_ZoneEntropy                      | 0.848163036 |
| wavelet-HLH_glszm_ZonePercentage                   | 0.965694491 |
| wavelet-HLH_glszm_ZoneVariance                     | 0.910427968 |
| wavelet-HLH_ngtdm_Busyness                         | 0.874064377 |
| wavelet-HLH_ngtdm_Coarseness                       | 0.991285689 |
| wavelet-HLH_ngtdm_Complexity                       | 0.991662868 |
| wavelet-HLH_ngtdm_Contrast                         | 0.998369233 |
| wavelet-HLH_ngtdm_Strength                         | 0.952484515 |
| wavelet-HLL_firstorder_10Percentile                | 0.96566858  |
| wavelet-HLL_firstorder_90Percentile                | 0.859222248 |

---



---

|                                                    |             |
|----------------------------------------------------|-------------|
| wavelet-HLL_firstorder_Entropy                     | 0.883366998 |
| wavelet-HLL_firstorder_InterquartileRange          | 0.84311495  |
| wavelet-HLL_firstorder_Kurtosis                    | 0.988085887 |
| wavelet-HLL_firstorder_Maximum                     | 0.861698895 |
| wavelet-HLL_firstorder_Mean                        | 0.831243032 |
| wavelet-HLL_firstorder_MeanAbsoluteDeviation       | 0.859577728 |
| wavelet-HLL_firstorder_Median                      | 0.903663384 |
| wavelet-HLL_firstorder_Minimum                     | 0.803696659 |
| wavelet-HLL_firstorder_Range                       | 0.823656642 |
| wavelet-HLL_firstorder_RobustMeanAbsoluteDeviation | 0.841976699 |
| wavelet-HLL_firstorder_RootMeanSquared             | 0.844338625 |
| wavelet-HLL_firstorder_Skewness                    | 0.887142132 |
| wavelet-HLL_firstorder_Uniformity                  | 0.875010548 |
| wavelet-HLL_firstorder_Variance                    | 0.865162341 |
| wavelet-HLL_glcm_ClusterProminence                 | 0.8637827   |
| wavelet-HLL_glcm_ClusterShade                      | 0.929884696 |
| wavelet-HLL_glcm_ClusterTendency                   | 0.867209965 |
| wavelet-HLL_glcm_Contrast                          | 0.93652316  |
| wavelet-HLL_glcm_Correlation                       | 0.949957693 |
| wavelet-HLL_glcm_DifferenceAverage                 | 0.93011273  |
| wavelet-HLL_glcm_DifferenceEntropy                 | 0.895441475 |
| wavelet-HLL_glcm_DifferenceVariance                | 0.906099236 |
| wavelet-HLL_glcm_Id                                | 0.927985132 |
| wavelet-HLL_glcm_Idm                               | 0.927972763 |
| wavelet-HLL_glcm_Idmn                              | 0.963933792 |
| wavelet-HLL_glcm_Idn                               | 0.972037107 |
| wavelet-HLL_glcm_Imc1                              | 0.922645666 |
| wavelet-HLL_glcm_Imc2                              | 0.831249236 |
| wavelet-HLL_glcm_InverseVariance                   | 0.922528356 |

---

---

|                                                       |             |
|-------------------------------------------------------|-------------|
| wavelet-HLL_glcm_JointAverage                         | 0.762931015 |
| wavelet-HLL_glcm_JointEnergy                          | 0.905630734 |
| wavelet-HLL_glcm_JointEntropy                         | 0.889084638 |
| wavelet-HLL_glcm_MaximumProbability                   | 0.916880605 |
| wavelet-HLL_glcm_SumAverage                           | 0.762931015 |
| wavelet-HLL_glcm_SumEntropy                           | 0.8879184   |
| wavelet-HLL_glcm_SumSquares                           | 0.869822173 |
| wavelet-HLL_gldm_DependenceEntropy                    | 0.876396446 |
| wavelet-HLL_gldm_DependenceNonUniformity              | 0.977198036 |
| wavelet-HLL_gldm_DependenceNonUniformityNormalized    | 0.956515212 |
| wavelet-HLL_gldm_DependenceVariance                   | 0.964231009 |
| wavelet-HLL_gldm_GrayLevelVariance                    | 0.865185482 |
| wavelet-HLL_gldm_LargeDependenceEmphasis              | 0.937997214 |
| wavelet-HLL_gldm_LargeDependenceHighGrayLevelEmphasis | 0.876333366 |
| wavelet-HLL_gldm_LargeDependenceLowGrayLevelEmphasis  | 0.851993834 |
| wavelet-HLL_gldm_LowGrayLevelEmphasis                 | 0.990778477 |
| wavelet-HLL_gldm_SmallDependenceEmphasis              | 0.941641436 |
| wavelet-HLL_gldm_SmallDependenceHighGrayLevelEmphasis | 0.738129292 |
| wavelet-HLL_gldm_SmallDependenceLowGrayLevelEmphasis  | 0.992928197 |
| wavelet-HLL_glrlm_GrayLevelNonUniformity              | 0.724474288 |
| wavelet-HLL_glrlm_GrayLevelNonUniformityNormalized    | 0.857443993 |
| wavelet-HLL_glrlm_GrayLevelVariance                   | 0.863261105 |
| wavelet-HLL_glrlm_LongRunEmphasis                     | 0.939927409 |
| wavelet-HLL_glrlm_LongRunHighGrayLevelEmphasis        | 0.731338594 |
| wavelet-HLL_glrlm_LongRunLowGrayLevelEmphasis         | 0.983409344 |
| wavelet-HLL_glrlm_LowGrayLevelRunEmphasis             | 0.990221287 |
| wavelet-HLL_glrlm_RunEntropy                          | 0.87520375  |
| wavelet-HLL_glrlm_RunLengthNonUniformity              | 0.992679207 |
| wavelet-HLL_glrlm_RunLengthNonUniformityNormalized    | 0.931723385 |

---

---

|                                                    |             |
|----------------------------------------------------|-------------|
| wavelet-HLL_glrIm_RunPercentage                    | 0.934440055 |
| wavelet-HLL_glrIm_RunVariance                      | 0.944393465 |
| wavelet-HLL_glrIm_ShortRunEmphasis                 | 0.928014139 |
| wavelet-HLL_glrIm_ShortRunLowGrayLevelEmphasis     | 0.990844048 |
| wavelet-HLL_glszm_GrayLevelNonUniformity           | 0.985093262 |
| wavelet-HLL_glszm_GrayLevelNonUniformityNormalized | 0.839262186 |
| wavelet-HLL_glszm_GrayLevelVariance                | 0.864229509 |
| wavelet-HLL_glszm_HighGrayLevelZoneEmphasis        | 0.708052019 |
| wavelet-HLL_glszm_LargeAreaHighGrayLevelEmphasis   | 0.871034229 |
| wavelet-HLL_glszm_LowGrayLevelZoneEmphasis         | 0.990541553 |
| wavelet-HLL_glszm_SizeZoneNonUniformity            | 0.917452206 |
| wavelet-HLL_glszm_SizeZoneNonUniformityNormalized  | 0.93856905  |
| wavelet-HLL_glszm_SmallAreaEmphasis                | 0.936786854 |
| wavelet-HLL_glszm_SmallAreaHighGrayLevelEmphasis   | 0.723430675 |
| wavelet-HLL_glszm_SmallAreaLowGrayLevelEmphasis    | 0.990924654 |
| wavelet-HLL_glszm_ZoneEntropy                      | 0.918415109 |
| wavelet-HLL_glszm_ZonePercentage                   | 0.941578053 |
| wavelet-HLL_ngtdm_Coarseness                       | 0.987986002 |
| wavelet-HLL_ngtdm_Complexity                       | 0.965650448 |
| wavelet-HLL_ngtdm_Contrast                         | 0.996891266 |
| wavelet-HLL_ngtdm_Strength                         | 0.930068701 |
| wavelet-LHH_firstorder_10Percentile                | 0.964094887 |
| wavelet-LHH_firstorder_90Percentile                | 0.955725477 |
| wavelet-LHH_firstorder_Energy                      | 0.893390128 |
| wavelet-LHH_firstorder_Entropy                     | 0.93948053  |
| wavelet-LHH_firstorder_InterquartileRange          | 0.975935079 |
| wavelet-LHH_firstorder_Kurtosis                    | 0.87154666  |
| wavelet-LHH_firstorder_Maximum                     | 0.826583673 |
| wavelet-LHH_firstorder_Mean                        | 0.965410535 |

---

---

|                                                    |             |
|----------------------------------------------------|-------------|
| wavelet-LHH_firstorder_MeanAbsoluteDeviation       | 0.952654706 |
| wavelet-LHH_firstorder_Median                      | 0.82058795  |
| wavelet-LHH_firstorder_Minimum                     | 0.924276536 |
| wavelet-LHH_firstorder_Range                       | 0.873582874 |
| wavelet-LHH_firstorder_RobustMeanAbsoluteDeviation | 0.973132361 |
| wavelet-LHH_firstorder_RootMeanSquared             | 0.926462158 |
| wavelet-LHH_firstorder_TotalEnergy                 | 0.893390128 |
| wavelet-LHH_firstorder_Uniformity                  | 0.938135937 |
| wavelet-LHH_firstorder_Variance                    | 0.929274221 |
| wavelet-LHH_glcm_Autocorrelation                   | 0.902857769 |
| wavelet-LHH_glcm_ClusterProminence                 | 0.851285481 |
| wavelet-LHH_glcm_ClusterShade                      | 0.750735389 |
| wavelet-LHH_glcm_ClusterTendency                   | 0.92644278  |
| wavelet-LHH_glcm_Contrast                          | 0.936091379 |
| wavelet-LHH_glcm_Correlation                       | 0.91563014  |
| wavelet-LHH_glcm_DifferenceAverage                 | 0.957787892 |
| wavelet-LHH_glcm_DifferenceEntropy                 | 0.943080398 |
| wavelet-LHH_glcm_DifferenceVariance                | 0.906080229 |
| wavelet-LHH_glcm_Id                                | 0.958916024 |
| wavelet-LHH_glcm_Idm                               | 0.957990332 |
| wavelet-LHH_glcm_Idmn                              | 0.972554356 |
| wavelet-LHH_glcm_Idn                               | 0.984955059 |
| wavelet-LHH_glcm_Imc1                              | 0.867320497 |
| wavelet-LHH_glcm_Imc2                              | 0.88859032  |
| wavelet-LHH_glcm_InverseVariance                   | 0.953069045 |
| wavelet-LHH_glcm_JointAverage                      | 0.926886612 |
| wavelet-LHH_glcm_JointEnergy                       | 0.941751634 |
| wavelet-LHH_glcm_JointEntropy                      | 0.942596447 |
| wavelet-LHH_glcm_MaximumProbability                | 0.955050047 |

---

---

|                                                       |             |
|-------------------------------------------------------|-------------|
| wavelet-LHH_glcm_SumAverage                           | 0.926886612 |
| wavelet-LHH_glcm_SumEntropy                           | 0.933883728 |
| wavelet-LHH_glcm_SumSquares                           | 0.931351878 |
| wavelet-LHH_gldm_DependenceEntropy                    | 0.90510286  |
| wavelet-LHH_gldm_DependenceNonUniformity              | 0.998992867 |
| wavelet-LHH_gldm_DependenceNonUniformityNormalized    | 0.982927401 |
| wavelet-LHH_gldm_DependenceVariance                   | 0.967749596 |
| wavelet-LHH_gldm_GrayLevelNonUniformity               | 0.984217189 |
| wavelet-LHH_gldm_GrayLevelVariance                    | 0.928842215 |
| wavelet-LHH_gldm_HighGrayLevelEmphasis                | 0.902496301 |
| wavelet-LHH_gldm_LargeDependenceEmphasis              | 0.957539834 |
| wavelet-LHH_gldm_LargeDependenceHighGrayLevelEmphasis | 0.92375704  |
| wavelet-LHH_gldm_LargeDependenceLowGrayLevelEmphasis  | 0.977604838 |
| wavelet-LHH_gldm_LowGrayLevelEmphasis                 | 0.973911121 |
| wavelet-LHH_gldm_SmallDependenceEmphasis              | 0.962945229 |
| wavelet-LHH_gldm_SmallDependenceHighGrayLevelEmphasis | 0.936879315 |
| wavelet-LHH_gldm_SmallDependenceLowGrayLevelEmphasis  | 0.948487182 |
| wavelet-LHH_glrlm_GrayLevelNonUniformity              | 0.991838414 |
| wavelet-LHH_glrlm_GrayLevelNonUniformityNormalized    | 0.930865508 |
| wavelet-LHH_glrlm_GrayLevelVariance                   | 0.914894539 |
| wavelet-LHH_glrlm_HighGrayLevelRunEmphasis            | 0.902129636 |
| wavelet-LHH_glrlm_LongRunEmphasis                     | 0.955756129 |
| wavelet-LHH_glrlm_LongRunHighGrayLevelEmphasis        | 0.911712571 |
| wavelet-LHH_glrlm_LongRunLowGrayLevelEmphasis         | 0.972629444 |
| wavelet-LHH_glrlm_LowGrayLevelRunEmphasis             | 0.971000532 |
| wavelet-LHH_glrlm_RunEntropy                          | 0.917355089 |
| wavelet-LHH_glrlm_RunLengthNonUniformity              | 0.993834668 |
| wavelet-LHH_glrlm_RunLengthNonUniformityNormalized    | 0.960194305 |
| wavelet-LHH_glrlm_RunPercentage                       | 0.960014967 |

---

---

|                                                    |             |
|----------------------------------------------------|-------------|
| wavelet-LHH_gIrlm_RunVariance                      | 0.958489209 |
| wavelet-LHH_gIrlm_ShortRunEmphasis                 | 0.955389566 |
| wavelet-LHH_gIrlm_ShortRunHighGrayLevelEmphasis    | 0.901899623 |
| wavelet-LHH_gIrlm_ShortRunLowGrayLevelEmphasis     | 0.97030682  |
| wavelet-LHH_glszm_GrayLevelNonUniformity           | 0.991581835 |
| wavelet-LHH_glszm_GrayLevelNonUniformityNormalized | 0.854049178 |
| wavelet-LHH_glszm_GrayLevelVariance                | 0.848559075 |
| wavelet-LHH_glszm_HighGrayLevelZoneEmphasis        | 0.898277407 |
| wavelet-LHH_glszm_LargeAreaEmphasis                | 0.93402512  |
| wavelet-LHH_glszm_LargeAreaHighGrayLevelEmphasis   | 0.98973647  |
| wavelet-LHH_glszm_LargeAreaLowGrayLevelEmphasis    | 0.920632226 |
| wavelet-LHH_glszm_LowGrayLevelZoneEmphasis         | 0.883784169 |
| wavelet-LHH_glszm_SizeZoneNonUniformity            | 0.974164754 |
| wavelet-LHH_glszm_SizeZoneNonUniformityNormalized  | 0.894386997 |
| wavelet-LHH_glszm_SmallAreaEmphasis                | 0.887308648 |
| wavelet-LHH_glszm_SmallAreaHighGrayLevelEmphasis   | 0.898785068 |
| wavelet-LHH_glszm_SmallAreaLowGrayLevelEmphasis    | 0.854596253 |
| wavelet-LHH_glszm_ZoneEntropy                      | 0.922549066 |
| wavelet-LHH_glszm_ZonePercentage                   | 0.960928938 |
| wavelet-LHH_glszm_ZoneVariance                     | 0.934073083 |
| wavelet-LHH_ngtdm_Busyness                         | 0.911565203 |
| wavelet-LHH_ngtdm_Coarseness                       | 0.988203382 |
| wavelet-LHH_ngtdm_Complexity                       | 0.983273246 |
| wavelet-LHH_ngtdm_Contrast                         | 0.990911081 |
| wavelet-LHH_ngtdm_Strength                         | 0.951976044 |
| wavelet-LHL_firstorder_10Percentile                | 0.918321619 |
| wavelet-LHL_firstorder_90Percentile                | 0.8246771   |
| wavelet-LHL_firstorder_Energy                      | 0.923123695 |
| wavelet-LHL_firstorder_Entropy                     | 0.929315965 |

---

---

|                                                    |             |
|----------------------------------------------------|-------------|
| wavelet-LHL_firstorder_InterquartileRange          | 0.944719009 |
| wavelet-LHL_firstorder_Kurtosis                    | 0.809746969 |
| wavelet-LHL_firstorder_Maximum                     | 0.951113535 |
| wavelet-LHL_firstorder_Mean                        | 0.817379769 |
| wavelet-LHL_firstorder_MeanAbsoluteDeviation       | 0.933493459 |
| wavelet-LHL_firstorder_Median                      | 0.901285863 |
| wavelet-LHL_firstorder_Minimum                     | 0.858688066 |
| wavelet-LHL_firstorder_Range                       | 0.924841498 |
| wavelet-LHL_firstorder_RobustMeanAbsoluteDeviation | 0.939772031 |
| wavelet-LHL_firstorder_RootMeanSquared             | 0.928313246 |
| wavelet-LHL_firstorder_Skewness                    | 0.963345065 |
| wavelet-LHL_firstorder_TotalEnergy                 | 0.923123695 |
| wavelet-LHL_firstorder_Uniformity                  | 0.908428691 |
| wavelet-LHL_firstorder_Variance                    | 0.918095056 |
| wavelet-LHL_glcm_Autocorrelation                   | 0.87894497  |
| wavelet-LHL_glcm_ClusterProminence                 | 0.848415737 |
| wavelet-LHL_glcm_ClusterTendency                   | 0.919457997 |
| wavelet-LHL_glcm_Contrast                          | 0.928887462 |
| wavelet-LHL_glcm_Correlation                       | 0.857282356 |
| wavelet-LHL_glcm_DifferenceAverage                 | 0.947383169 |
| wavelet-LHL_glcm_DifferenceEntropy                 | 0.938952668 |
| wavelet-LHL_glcm_DifferenceVariance                | 0.919893164 |
| wavelet-LHL_glcm_Id                                | 0.952291995 |
| wavelet-LHL_glcm_Idm                               | 0.951224476 |
| wavelet-LHL_glcm_Idmn                              | 0.947667231 |
| wavelet-LHL_glcm_Idn                               | 0.959513052 |
| wavelet-LHL_glcm_Imc1                              | 0.96040539  |
| wavelet-LHL_glcm_Imc2                              | 0.937066006 |
| wavelet-LHL_glcm_InverseVariance                   | 0.953954247 |

---

---

|                                                       |             |
|-------------------------------------------------------|-------------|
| wavelet-LHL_glcm_JointAverage                         | 0.860258681 |
| wavelet-LHL_glcm_JointEnergy                          | 0.879125978 |
| wavelet-LHL_glcm_JointEntropy                         | 0.929286004 |
| wavelet-LHL_glcm_MaximumProbability                   | 0.927906173 |
| wavelet-LHL_glcm_SumAverage                           | 0.860258681 |
| wavelet-LHL_glcm_SumEntropy                           | 0.921040501 |
| wavelet-LHL_glcm_SumSquares                           | 0.924892687 |
| wavelet-LHL_gldm_DependenceEntropy                    | 0.888178543 |
| wavelet-LHL_gldm_DependenceNonUniformity              | 0.993496428 |
| wavelet-LHL_gldm_DependenceNonUniformityNormalized    | 0.973914974 |
| wavelet-LHL_gldm_DependenceVariance                   | 0.96547523  |
| wavelet-LHL_gldm_GrayLevelNonUniformity               | 0.98538651  |
| wavelet-LHL_gldm_GrayLevelVariance                    | 0.918288815 |
| wavelet-LHL_gldm_HighGrayLevelEmphasis                | 0.879191445 |
| wavelet-LHL_gldm_LargeDependenceEmphasis              | 0.931918482 |
| wavelet-LHL_gldm_LargeDependenceHighGrayLevelEmphasis | 0.834306468 |
| wavelet-LHL_gldm_LargeDependenceLowGrayLevelEmphasis  | 0.804773761 |
| wavelet-LHL_gldm_LowGrayLevelEmphasis                 | 0.978247363 |
| wavelet-LHL_gldm_SmallDependenceEmphasis              | 0.966477806 |
| wavelet-LHL_gldm_SmallDependenceHighGrayLevelEmphasis | 0.949685653 |
| wavelet-LHL_gldm_SmallDependenceLowGrayLevelEmphasis  | 0.946890723 |
| wavelet-LHL_glrlm_GrayLevelNonUniformity              | 0.991693362 |
| wavelet-LHL_glrlm_GrayLevelNonUniformityNormalized    | 0.906813752 |
| wavelet-LHL_glrlm_GrayLevelVariance                   | 0.916108553 |
| wavelet-LHL_glrlm_HighGrayLevelRunEmphasis            | 0.878867955 |
| wavelet-LHL_glrlm_LongRunEmphasis                     | 0.922258485 |
| wavelet-LHL_glrlm_LongRunHighGrayLevelEmphasis        | 0.849636347 |
| wavelet-LHL_glrlm_LongRunLowGrayLevelEmphasis         | 0.955290946 |
| wavelet-LHL_glrlm_LowGrayLevelRunEmphasis             | 0.97672     |

---



---

|                                                    |             |
|----------------------------------------------------|-------------|
| wavelet-LHL_glrIm_RunEntropy                       | 0.911885223 |
| wavelet-LHL_glrIm_RunLengthNonUniformity           | 0.996319787 |
| wavelet-LHL_glrIm_RunLengthNonUniformityNormalized | 0.953696308 |
| wavelet-LHL_glrIm_RunPercentage                    | 0.948601263 |
| wavelet-LHL_glrIm_RunVariance                      | 0.921930919 |
| wavelet-LHL_glrIm_ShortRunEmphasis                 | 0.944492454 |
| wavelet-LHL_glrIm_ShortRunHighGrayLevelEmphasis    | 0.88565268  |
| wavelet-LHL_glrIm_ShortRunLowGrayLevelEmphasis     | 0.977858022 |
| wavelet-LHL_glszm_GrayLevelNonUniformity           | 0.997067967 |
| wavelet-LHL_glszm_GrayLevelNonUniformityNormalized | 0.89046989  |
| wavelet-LHL_glszm_GrayLevelVariance                | 0.929252099 |
| wavelet-LHL_glszm_HighGrayLevelZoneEmphasis        | 0.876184452 |
| wavelet-LHL_glszm_LargeAreaEmphasis                | 0.961868987 |
| wavelet-LHL_glszm_LargeAreaHighGrayLevelEmphasis   | 0.826752768 |
| wavelet-LHL_glszm_LargeAreaLowGrayLevelEmphasis    | 0.991768812 |
| wavelet-LHL_glszm_LowGrayLevelZoneEmphasis         | 0.964168858 |
| wavelet-LHL_glszm_SizeZoneNonUniformity            | 0.969756377 |
| wavelet-LHL_glszm_SizeZoneNonUniformityNormalized  | 0.964019894 |
| wavelet-LHL_glszm_SmallAreaEmphasis                | 0.966932805 |
| wavelet-LHL_glszm_SmallAreaHighGrayLevelEmphasis   | 0.892409012 |
| wavelet-LHL_glszm_SmallAreaLowGrayLevelEmphasis    | 0.933863132 |
| wavelet-LHL_glszm_ZoneEntropy                      | 0.931869176 |
| wavelet-LHL_glszm_ZonePercentage                   | 0.968550399 |
| wavelet-LHL_glszm_ZoneVariance                     | 0.961897033 |
| wavelet-LHL_ngtdm_Busyness                         | 0.997589932 |
| wavelet-LHL_ngtdm_Coarseness                       | 0.988006095 |
| wavelet-LHL_ngtdm_Complexity                       | 0.957315563 |
| wavelet-LHL_ngtdm_Contrast                         | 0.997802575 |
| wavelet-LHL_ngtdm_Strength                         | 0.981478616 |

---

---

|                                                    |             |
|----------------------------------------------------|-------------|
| wavelet-LLH_firstorder_10Percentile                | 0.986051258 |
| wavelet-LLH_firstorder_90Percentile                | 0.926815129 |
| wavelet-LLH_firstorder_Energy                      | 0.979459331 |
| wavelet-LLH_firstorder_Entropy                     | 0.966337722 |
| wavelet-LLH_firstorder_InterquartileRange          | 0.986581784 |
| wavelet-LLH_firstorder_Kurtosis                    | 0.872155509 |
| wavelet-LLH_firstorder_Maximum                     | 0.951466229 |
| wavelet-LLH_firstorder_Mean                        | 0.95692203  |
| wavelet-LLH_firstorder_MeanAbsoluteDeviation       | 0.979362462 |
| wavelet-LLH_firstorder_Median                      | 0.962115144 |
| wavelet-LLH_firstorder_Minimum                     | 0.949526473 |
| wavelet-LLH_firstorder_Range                       | 0.951471771 |
| wavelet-LLH_firstorder_RobustMeanAbsoluteDeviation | 0.980504999 |
| wavelet-LLH_firstorder_RootMeanSquared             | 0.98883328  |
| wavelet-LLH_firstorder_Skewness                    | 0.962859799 |
| wavelet-LLH_firstorder_TotalEnergy                 | 0.979459331 |
| wavelet-LLH_firstorder_Uniformity                  | 0.974347714 |
| wavelet-LLH_firstorder_Variance                    | 0.992207658 |
| wavelet-LLH_glcm_Autocorrelation                   | 0.96965008  |
| wavelet-LLH_glcm_ClusterProminence                 | 0.998263788 |
| wavelet-LLH_glcm_ClusterShade                      | 0.997917303 |
| wavelet-LLH_glcm_ClusterTendency                   | 0.989982624 |
| wavelet-LLH_glcm_Contrast                          | 0.991027866 |
| wavelet-LLH_glcm_Correlation                       | 0.942912322 |
| wavelet-LLH_glcm_DifferenceAverage                 | 0.977241838 |
| wavelet-LLH_glcm_DifferenceEntropy                 | 0.967016706 |
| wavelet-LLH_glcm_DifferenceVariance                | 0.992091268 |
| wavelet-LLH_glcm_Id                                | 0.975609746 |
| wavelet-LLH_glcm_Idm                               | 0.976253378 |

---

---

|                                                       |             |
|-------------------------------------------------------|-------------|
| wavelet-LLH_glcm_Idmn                                 | 0.946605418 |
| wavelet-LLH_glcm_Idn                                  | 0.955024472 |
| wavelet-LLH_glcm_Imc1                                 | 0.994005105 |
| wavelet-LLH_glcm_Imc2                                 | 0.981309544 |
| wavelet-LLH_glcm_InverseVariance                      | 0.969972536 |
| wavelet-LLH_glcm_JointAverage                         | 0.947170886 |
| wavelet-LLH_glcm_JointEnergy                          | 0.979807552 |
| wavelet-LLH_glcm_JointEntropy                         | 0.962387862 |
| wavelet-LLH_glcm_MaximumProbability                   | 0.979818707 |
| wavelet-LLH_glcm_SumAverage                           | 0.947170886 |
| wavelet-LLH_glcm_SumEntropy                           | 0.963363596 |
| wavelet-LLH_glcm_SumSquares                           | 0.990541401 |
| wavelet-LLH_gldm_DependenceEntropy                    | 0.906194368 |
| wavelet-LLH_gldm_DependenceNonUniformity              | 0.999334875 |
| wavelet-LLH_gldm_DependenceNonUniformityNormalized    | 0.982416899 |
| wavelet-LLH_gldm_DependenceVariance                   | 0.979999148 |
| wavelet-LLH_gldm_GrayLevelNonUniformity               | 0.997882875 |
| wavelet-LLH_gldm_GrayLevelVariance                    | 0.992193046 |
| wavelet-LLH_gldm_HighGrayLevelEmphasis                | 0.970659968 |
| wavelet-LLH_gldm_LargeDependenceEmphasis              | 0.983057664 |
| wavelet-LLH_gldm_LargeDependenceHighGrayLevelEmphasis | 0.930106705 |
| wavelet-LLH_gldm_LargeDependenceLowGrayLevelEmphasis  | 0.837333948 |
| wavelet-LLH_gldm_LowGrayLevelEmphasis                 | 0.763396946 |
| wavelet-LLH_gldm_SmallDependenceEmphasis              | 0.973604916 |
| wavelet-LLH_gldm_SmallDependenceHighGrayLevelEmphasis | 0.991516293 |
| wavelet-LLH_gldm_SmallDependenceLowGrayLevelEmphasis  | 0.869905846 |
| wavelet-LLH_glrlm_GrayLevelNonUniformity              | 0.998402769 |
| wavelet-LLH_glrlm_GrayLevelNonUniformityNormalized    | 0.967008692 |
| wavelet-LLH_glrlm_GrayLevelVariance                   | 0.991886337 |

---

---

|                                                    |             |
|----------------------------------------------------|-------------|
| wavelet-LLH_glrIm_HighGrayLevelRunEmphasis         | 0.97081603  |
| wavelet-LLH_glrIm_LongRunEmphasis                  | 0.983635335 |
| wavelet-LLH_glrIm_LongRunHighGrayLevelEmphasis     | 0.943589045 |
| wavelet-LLH_glrIm_LongRunLowGrayLevelEmphasis      | 0.729216003 |
| wavelet-LLH_glrIm_LowGrayLevelRunEmphasis          | 0.757470379 |
| wavelet-LLH_glrIm_RunEntropy                       | 0.938765282 |
| wavelet-LLH_glrIm_RunLengthNonUniformity           | 0.999354486 |
| wavelet-LLH_glrIm_RunLengthNonUniformityNormalized | 0.979636637 |
| wavelet-LLH_glrIm_RunPercentage                    | 0.981951887 |
| wavelet-LLH_glrIm_RunVariance                      | 0.985067408 |
| wavelet-LLH_glrIm_ShortRunEmphasis                 | 0.980412027 |
| wavelet-LLH_glrIm_ShortRunHighGrayLevelEmphasis    | 0.975216566 |
| wavelet-LLH_glrIm_ShortRunLowGrayLevelEmphasis     | 0.768400368 |
| wavelet-LLH_glszm_GrayLevelNonUniformity           | 0.999417208 |
| wavelet-LLH_glszm_GrayLevelNonUniformityNormalized | 0.898365132 |
| wavelet-LLH_glszm_GrayLevelVariance                | 0.990812421 |
| wavelet-LLH_glszm_HighGrayLevelZoneEmphasis        | 0.972037057 |
| wavelet-LLH_glszm_LargeAreaEmphasis                | 0.997594672 |
| wavelet-LLH_glszm_LargeAreaHighGrayLevelEmphasis   | 0.974153376 |
| wavelet-LLH_glszm_LargeAreaLowGrayLevelEmphasis    | 0.998863704 |
| wavelet-LLH_glszm_SizeZoneNonUniformity            | 0.997263817 |
| wavelet-LLH_glszm_SizeZoneNonUniformityNormalized  | 0.927626868 |
| wavelet-LLH_glszm_SmallAreaEmphasis                | 0.919321192 |
| wavelet-LLH_glszm_SmallAreaHighGrayLevelEmphasis   | 0.978366531 |
| wavelet-LLH_glszm_SmallAreaLowGrayLevelEmphasis    | 0.717595588 |
| wavelet-LLH_glszm_ZoneEntropy                      | 0.905476812 |
| wavelet-LLH_glszm_ZonePercentage                   | 0.973668881 |
| wavelet-LLH_glszm_ZoneVariance                     | 0.997595629 |
| wavelet-LLH_ngtdm_Busyness                         | 0.986682467 |

---

---

|                                                    |             |
|----------------------------------------------------|-------------|
| wavelet-LLH_ngtdm_Coarseness                       | 0.988631271 |
| wavelet-LLH_ngtdm_Complexity                       | 0.99566555  |
| wavelet-LLH_ngtdm_Contrast                         | 0.999742851 |
| wavelet-LLH_ngtdm_Strength                         | 0.992913078 |
| wavelet-LLL_firstorder_10Percentile                | 0.912676182 |
| wavelet-LLL_firstorder_90Percentile                | 0.997932079 |
| wavelet-LLL_firstorder_Energy                      | 0.703280032 |
| wavelet-LLL_firstorder_Entropy                     | 0.874407884 |
| wavelet-LLL_firstorder_InterquartileRange          | 0.737099639 |
| wavelet-LLL_firstorder_Kurtosis                    | 0.88796652  |
| wavelet-LLL_firstorder_Maximum                     | 0.916720282 |
| wavelet-LLL_firstorder_Mean                        | 0.969431234 |
| wavelet-LLL_firstorder_MeanAbsoluteDeviation       | 0.750592593 |
| wavelet-LLL_firstorder_Median                      | 0.97532942  |
| wavelet-LLL_firstorder_Minimum                     | 0.881717533 |
| wavelet-LLL_firstorder_Range                       | 0.787796763 |
| wavelet-LLL_firstorder_RobustMeanAbsoluteDeviation | 0.732069661 |
| wavelet-LLL_firstorder_RootMeanSquared             | 0.967086417 |
| wavelet-LLL_firstorder_Skewness                    | 0.908900219 |
| wavelet-LLL_firstorder_TotalEnergy                 | 0.703280032 |
| wavelet-LLL_firstorder_Uniformity                  | 0.908323261 |
| wavelet-LLL_firstorder_Variance                    | 0.714758475 |
| wavelet-LLL_glcm_Autocorrelation                   | 0.798184323 |
| wavelet-LLL_glcm_ClusterShade                      | 0.927022624 |
| wavelet-LLL_glcm_Contrast                          | 0.902806833 |
| wavelet-LLL_glcm_Correlation                       | 0.933439725 |
| wavelet-LLL_glcm_DifferenceAverage                 | 0.927263448 |
| wavelet-LLL_glcm_DifferenceEntropy                 | 0.93566767  |
| wavelet-LLL_glcm_DifferenceVariance                | 0.8980349   |

---

---

|                                                       |             |
|-------------------------------------------------------|-------------|
| wavelet-LLL_glcM_Id                                   | 0.958458759 |
| wavelet-LLL_glcM_Idm                                  | 0.960571666 |
| wavelet-LLL_glcM_Idmn                                 | 0.958361346 |
| wavelet-LLL_glcM_Idn                                  | 0.969831399 |
| wavelet-LLL_glcM_Imc1                                 | 0.931542739 |
| wavelet-LLL_glcM_Imc2                                 | 0.913023621 |
| wavelet-LLL_glcM_InverseVariance                      | 0.954917886 |
| wavelet-LLL_glcM_JointAverage                         | 0.818868044 |
| wavelet-LLL_glcM_JointEnergy                          | 0.931295448 |
| wavelet-LLL_glcM_JointEntropy                         | 0.900119809 |
| wavelet-LLL_glcM_MaximumProbability                   | 0.948421777 |
| wavelet-LLL_glcM_SumAverage                           | 0.818868044 |
| wavelet-LLL_glcM_SumEntropy                           | 0.87230533  |
| wavelet-LLL_gldm_DependenceEntropy                    | 0.907234977 |
| wavelet-LLL_gldm_DependenceNonUniformity              | 0.992631748 |
| wavelet-LLL_gldm_DependenceNonUniformityNormalized    | 0.964858256 |
| wavelet-LLL_gldm_DependenceVariance                   | 0.98169924  |
| wavelet-LLL_gldm_GrayLevelNonUniformity               | 0.946568595 |
| wavelet-LLL_gldm_GrayLevelVariance                    | 0.714838013 |
| wavelet-LLL_gldm_HighGrayLevelEmphasis                | 0.794073023 |
| wavelet-LLL_gldm_LargeDependenceEmphasis              | 0.969499952 |
| wavelet-LLL_gldm_LargeDependenceHighGrayLevelEmphasis | 0.927002067 |
| wavelet-LLL_gldm_LargeDependenceLowGrayLevelEmphasis  | 0.960483847 |
| wavelet-LLL_gldm_LowGrayLevelEmphasis                 | 0.988069979 |
| wavelet-LLL_gldm_SmallDependenceEmphasis              | 0.963295203 |
| wavelet-LLL_gldm_SmallDependenceHighGrayLevelEmphasis | 0.865301944 |
| wavelet-LLL_gldm_SmallDependenceLowGrayLevelEmphasis  | 0.990268261 |
| wavelet-LLL_glrIm_GrayLevelNonUniformity              | 0.950732228 |
| wavelet-LLL_glrIm_GrayLevelNonUniformityNormalized    | 0.896798377 |

---

---

|                                                    |             |
|----------------------------------------------------|-------------|
| wavelet-LLL_gIrlm_GrayLevelVariance                | 0.716416349 |
| wavelet-LLL_gIrlm_HighGrayLevelRunEmphasis         | 0.792665307 |
| wavelet-LLL_gIrlm_LongRunEmphasis                  | 0.966615591 |
| wavelet-LLL_gIrlm_LongRunHighGrayLevelEmphasis     | 0.814187447 |
| wavelet-LLL_gIrlm_LongRunLowGrayLevelEmphasis      | 0.986471782 |
| wavelet-LLL_gIrlm_LowGrayLevelRunEmphasis          | 0.988064813 |
| wavelet-LLL_gIrlm_RunEntropy                       | 0.829504809 |
| wavelet-LLL_gIrlm_RunLengthNonUniformity           | 0.99822846  |
| wavelet-LLL_gIrlm_RunLengthNonUniformityNormalized | 0.966963103 |
| wavelet-LLL_gIrlm_RunPercentage                    | 0.968358742 |
| wavelet-LLL_gIrlm_RunVariance                      | 0.969551674 |
| wavelet-LLL_gIrlm_ShortRunEmphasis                 | 0.965087044 |
| wavelet-LLL_gIrlm_ShortRunHighGrayLevelEmphasis    | 0.79367759  |
| wavelet-LLL_gIrlm_ShortRunLowGrayLevelEmphasis     | 0.988310696 |
| wavelet-LLL_glszm_GrayLevelNonUniformity           | 0.998878246 |
| wavelet-LLL_glszm_GrayLevelNonUniformityNormalized | 0.857243599 |
| wavelet-LLL_glszm_GrayLevelVariance                | 0.755295582 |
| wavelet-LLL_glszm_HighGrayLevelZoneEmphasis        | 0.779956713 |
| wavelet-LLL_glszm_LargeAreaEmphasis                | 0.851437552 |
| wavelet-LLL_glszm_LargeAreaHighGrayLevelEmphasis   | 0.977268828 |
| wavelet-LLL_glszm_LowGrayLevelZoneEmphasis         | 0.987019728 |
| wavelet-LLL_glszm_SizeZoneNonUniformity            | 0.944093968 |
| wavelet-LLL_glszm_SizeZoneNonUniformityNormalized  | 0.936209976 |
| wavelet-LLL_glszm_SmallAreaEmphasis                | 0.943702174 |
| wavelet-LLL_glszm_SmallAreaHighGrayLevelEmphasis   | 0.79748933  |
| wavelet-LLL_glszm_SmallAreaLowGrayLevelEmphasis    | 0.988311566 |
| wavelet-LLL_glszm_ZoneEntropy                      | 0.925570226 |
| wavelet-LLL_glszm_ZonePercentage                   | 0.966666518 |
| wavelet-LLL_glszm_ZoneVariance                     | 0.85144832  |

---

---

|                              |             |
|------------------------------|-------------|
| wavelet-LLL_ngtdm_Busyness   | 0.794169494 |
| wavelet-LLL_ngtdm_Coarseness | 0.994011042 |
| wavelet-LLL_ngtdm_Complexity | 0.973866696 |
| wavelet-LLL_ngtdm_Contrast   | 0.992347226 |
| wavelet-LLL_ngtdm_Strength   | 0.960167595 |

---

A total of 1,672 features were extracted from the tumour images, but 75 were excluded due to missing values.
